# Supplementary material for: The diagnostic accuracy of clinical examination for estimating cardiac index in critically ill patients: the Simple Intensive Care Studies-I
Source: Springer Nature journal article supplement (doi:10.1007/s00134-019-05527-y), 2019-01-31
Supplement: MOESM2 [file 16433990]

## SUPPLEMENTAL FIGURES AND TABLES

## The diagnostic accuracy of clinical examination for estimating cardiac index in critically ill patients: the Simple Intensive Care Studies-I

Bart Hiemstra, MD<sup>1</sup>; Geert Koster, MD<sup>1</sup>; Renske Wiersema, BSc<sup>1</sup>; Yoran M Hummel, PhD<sup>2</sup>; Pim van der Harst, MD, PhD<sup>2</sup>; Harold Snieder, PhD<sup>3</sup>; Ruben J Eck, MD<sup>1</sup>; Thomas Kaufmann, MD<sup>4</sup>; Thomas WL Scheeren, MD, PhD<sup>4</sup>; Anders Perner, MD, PhD<sup>5;6</sup>; Jørn Wetterslev, MD, PhD<sup>6;7</sup>; Anne Marie GA de Smet, MD, PhD<sup>1</sup>; Frederik Keus, MD, PhD<sup>1</sup>; Iwan CC van der Horst, MD, PhD<sup>1</sup>; SICS Study Group<sup>1</sup>

### Content

|                                                                                                    |    |
|----------------------------------------------------------------------------------------------------|----|
| Descriptives .....                                                                                 | 2  |
| Primary analysis: univariable (unadjusted) analyses .....                                          | 3  |
| Primary analysis: internal validation and diagnostics of the multivariable linear regression ..... | 4  |
| Secondary analysis: diagnostic performance .....                                                   | 8  |
| Sensitivity analysis I: primary analysis with imputed cardiac index measurements .....             | 16 |
| Univariable (unadjusted) analyses .....                                                            | 16 |
| Multivariable linear regression, internal validation and diagnostics .....                         | 17 |
| Sensitivity analysis II: diagnostic performance with imputed cardiac index measurements .....      | 18 |

## Descriptives

**e-Table 1.** Description of collected variables and percentage of missingness

| Variable                                                                                                        | Method of measuring                                                                                                                      | Missing % |
|-----------------------------------------------------------------------------------------------------------------|------------------------------------------------------------------------------------------------------------------------------------------|-----------|
| Age, years                                                                                                      | Patient's electronic chart                                                                                                               | 0.0       |
| Male gender                                                                                                     | Patient's electronic chart                                                                                                               | 0.0       |
| Mechanical ventilation                                                                                          |                                                                                                                                          |           |
| PEEP, cmH <sub>2</sub> O                                                                                        | mechanical ventilator                                                                                                                    | 0.0       |
| Set respiratory rate, per minute                                                                                | mechanical ventilator                                                                                                                    | 0.0       |
| Vasoactive medication, $\mu\text{g}\cdot\text{kg}^{-1}\cdot\text{min}^{-1}$                                     | Infusion pump inspection at bedside                                                                                                      | 0.0       |
| <i>Central circulation</i>                                                                                      |                                                                                                                                          |           |
| Respiratory rate, per minute                                                                                    | bedside (electrocardiographic) monitor                                                                                                   | 0.0       |
| Heart rate, beats per minute                                                                                    | bedside (electrocardiographic) monitor                                                                                                   | 0.0       |
| Heart rhythm                                                                                                    | bedside (electrocardiographic) monitor                                                                                                   | 0.0       |
| Systolic blood pressure, mmHg                                                                                   | arterial line and sphygmomanometer                                                                                                       | 0.2       |
| Diastolic blood pressure, mmHg                                                                                  | arterial line and sphygmomanometer                                                                                                       | 0.2       |
| Mean arterial pressure, mmHg                                                                                    | arterial line and sphygmomanometer                                                                                                       | 0.3       |
| Central venous pressure, mmHg                                                                                   | central venous line in internal jugular, subclavian or femoral vein                                                                      | 76.5*     |
| Cardiac murmurs                                                                                                 | Auscultation at the 2 <sup>nd</sup> intercostal space left and right, 4 <sup>th</sup> or 5 <sup>th</sup> intercostal space left and apex | 9.6       |
| Pulmonary crepitations or crackles                                                                              | Auscultation of the chest at the superior, inferior and basal lung fields                                                                | 1.3       |
| <i>Organ perfusion</i>                                                                                          |                                                                                                                                          |           |
| Mental state (alert/voice/pain/unresponsive)                                                                    | Observation                                                                                                                              | 0.0       |
| Sedative medication, $\mu\text{g}\cdot\text{kg}^{-1}\cdot\text{min}^{-1}$                                       | Infusion pump inspection at bedside                                                                                                      | 4.9       |
| Urine output, $\text{ml}\cdot\text{kg}^{-1}\cdot\text{h}^{-1}$                                                  | Patient's electronic chart                                                                                                               | 1.9       |
| Central temperature, °C                                                                                         | Bladder thermistor catheter                                                                                                              | 1.5       |
| Skin temperature dorsum foot, °C                                                                                | skin temperature of dorsum foot using skin probe                                                                                         | 15.3      |
| Skin temperature big toe, °C                                                                                    | skin temperature of big toe using skin probe                                                                                             | 9.9       |
| $\Delta$ -Temperature or $\Delta\text{Tc-p}$                                                                    | Bladder to dorsum foot or big toe difference                                                                                             | 15.3      |
| Cold extremities, cold or warm                                                                                  | Subjective assessment                                                                                                                    | 0.6       |
| Capillary refill time sternum, s                                                                                | Palpation                                                                                                                                | 13.7      |
| Capillary refill time finger, s                                                                                 | Palpation                                                                                                                                | 2.5       |
| Capillary refill time knee, s                                                                                   | Palpation                                                                                                                                | 9.9       |
| Mottling severity, score from 0 to 5                                                                            | Observation of mottling area on the legs, scoring system according to Ait-Oufella.                                                       | 10.1      |
| <b>Critical care ultrasonography</b>                                                                            |                                                                                                                                          |           |
| Cardiac output, $\text{L}\cdot\text{min}^{-1}$                                                                  | Critical care ultrasonography                                                                                                            | 22.8      |
| Cardiac output adjusted for body surface area (cardiac index), $\text{L}\cdot\text{min}^{-1}\cdot\text{m}^{-2}$ | Critical care ultrasonography                                                                                                            | 22.8      |

\*Central venous pressure was missing in > 50% of the patients and was excluded from the multiple imputations and multivariable analyses.

## Primary analysis: univariable (unadjusted) analyses

e-Table 2. Univariable associations of clinical examination with cardiac index as a continuous variable

| Variable                                                      | Coefficient | SE        | 98.5% CI       | R <sup>2</sup> | P-Value |
|---------------------------------------------------------------|-------------|-----------|----------------|----------------|---------|
| <b>Covariates</b>                                             |             |           |                |                |         |
| Age, years                                                    | 0.00        | 0.00      | -0.01 to 0.00  | 0.002          | 0.24    |
| Male gender                                                   | -0.32       | 0.07      | -0.48 to -0.15 | 0.028          | <0.001  |
| Mechanical ventilation                                        | -0.28       | 0.07      | -0.44 to -0.12 | 0.023          | <0.001  |
| PEEP, cm H <sub>2</sub> O                                     | -0.03       | 0.01      | -0.05 to -0.01 | 0.020          | <0.001  |
| Noradrenaline dose, µg·kg <sup>-1</sup> ·min <sup>-1</sup>    | 0.31        | 0.19      | -0.14 to 0.76  | 0.004          | 0.10    |
| <b>Central circulation</b>                                    |             |           |                |                |         |
| Respiratory rate, per minute                                  | 0.01        | 0.01      | 0.00 to 0.02   | 0.004          | 0.08    |
| Heart rate, beats per minute                                  | 0.02        | 0.00      | 0.01 to 0.02   | 0.142          | <0.001  |
| Atrial fibrillation                                           | -0.18       | 0.13      | -0.49 to 0.13  | 0.003          | 0.16    |
| Systolic blood pressure, mmHg                                 | 0.01        | 0.00      | 0.00 to 0.01   | 0.020          | <0.001  |
| Diastolic blood pressure, mmHg                                | 0.00        | 0.00      | -0.01 to 0.00  | 0.003          | 0.14    |
| Mean arterial pressure, mmHg                                  | 0.00        | 0.00      | 0.00 to 0.01   | 0.003          | 0.14    |
| Central venous pressure, mmHg                                 | -0.01       | 0.01      | -0.04 to 0.02  | 0.007          | 0.30    |
| Cardiac murmurs                                               | 0.32        | 0.11      | 0.04 to 0.59   | 0.013          | 0.005   |
| Crepitations                                                  | 0.12        | 0.09      | -0.11 to 0.35  | 0.003          | 0.21    |
| <b>Organ perfusion</b>                                        |             |           |                |                |         |
| Consciousness, n (%)                                          |             |           |                |                |         |
| alert                                                         |             | Reference |                | 0.028          |         |
| reacting to voice                                             | 0.28        | 0.09      | 0.05 to 0.50   |                | 0.003   |
| reacting to pain                                              | 0.00        | 0.17      | -0.40 to 0.40  |                | 0.99    |
| unresponsive                                                  | 0.06        | 0.14      | -0.28 to 0.40  |                | 0.65    |
| Urine output last hour, ml·kg <sup>-1</sup> ·h <sup>-1</sup>  | 0.06        | 0.03      | -0.02 to 0.14  | 0.004          | 0.08    |
| Urine output in 6 hours, ml·kg <sup>-1</sup> ·h <sup>-1</sup> | 0.09        | 0.04      | -0.01 to 0.20  | 0.007          | 0.032   |
| Central temperature, °C                                       | 0.19        | 0.04      | 0.11 to 0.28   | 0.038          | <0.001  |
| ΔTc-p, central to dorsum foot, °C                             | -0.06       | 0.01      | -0.09 to -0.04 | 0.048          | <0.001  |
| ΔTc-p, central to big toe, °C                                 | -0.05       | 0.01      | -0.07 to -0.03 | 0.044          | <0.001  |
| Cold extremities, subjective                                  | 0.34        | 0.07      | 0.18 to 0.51   | 0.032          | <0.001  |
| Capillary refill time sternum, s                              | -0.13       | 0.03      | -0.20 to -0.06 | 0.028          | <0.001  |
| Capillary refill time finger, s                               | -0.06       | 0.01      | -0.09 to -0.02 | 0.019          | <0.001  |
| Capillary refill time knee, s                                 | -0.06       | 0.01      | -0.09 to -0.02 | 0.024          | <0.001  |
| Skin mottling severity, n (%)                                 |             |           |                |                |         |
| Mild (0-1)                                                    |             | Reference |                | 0.004          |         |
| Moderate (2-3)                                                | -0.11       | 0.08      | -0.30 to 0.08  |                | 0.17    |
| Severe (4-5)                                                  | -0.13       | 0.20      | -0.60 to 0.35  |                | 0.53    |

Abbreviations: SE, standard error; PEEP, positive end expiratory pressure; ΔTc-p, central-to-peripheral temperature difference.

## Primary analysis: internal validation and diagnostics of the multivariable linear regression

e-Table 3. Multivariable linear regression, predictors for cardiac index as a continuous variable

| Variable                                                                        | B     | SE                                   | 98.5% CI           | P value | $\beta$ | Significant # out of 100   |
|---------------------------------------------------------------------------------|-------|--------------------------------------|--------------------|---------|---------|----------------------------|
| <b><i>Covariates</i></b>                                                        |       |                                      |                    |         |         |                            |
| Male gender                                                                     | -0.24 | 0.06                                 | -0.38 to -0.10     | <0.001  | -0.12   | 97                         |
| Mechanical ventilation                                                          | -0.14 | 0.06                                 | -0.29 to 0.01      | 0.021   | -0.08   | 91                         |
| Noradrenaline per $\mu\text{g}\cdot\text{kg}^{-1}\cdot\text{min}^{-1}$ increase | 0.17  | 0.17                                 | -0.26 to 0.59      | 0.339   | 0.03    | 53                         |
| <b><i>Clinical signs reflecting the central circulation</i></b>                 |       |                                      |                    |         |         |                            |
| Respiratory rate per minute increase                                            | -0.02 | 0.01                                 | -0.03 to 0.00      | 0.003   | -0.10   | 85                         |
| Heart rate in beats per minute                                                  | 0.02  | 0.00                                 | 0.02 to 0.02       | <0.001  | 0.47    | 100                        |
| Atrial fibrillation                                                             | -0.37 | 0.11                                 | -0.64 to -0.10     | 0.001   | -0.10   | 91                         |
| Systolic blood pressure per mmHg increase                                       | 0.01  | 0.00                                 | 0.01 to 0.01       | <0.001  | 0.27    | 100                        |
| Diastolic blood pressure per mmHg increase                                      | -0.02 | 0.00                                 | -0.02 to -0.01     | <0.001  | -0.20   | 100                        |
| Cardiac murmurs                                                                 | 0.22  | 0.09                                 | -0.01 to 0.45      | 0.018   | 0.07    | 72                         |
| <b><i>Clinical signs reflecting organ perfusion</i></b>                         |       |                                      |                    |         |         |                            |
| CRT on the sternum per sec increase                                             | -0.08 | 0.03                                 | -0.15 to -0.01     | 0.005   | -0.10   | 91                         |
| $\Delta\text{Tc-p}$ , central to big toe per $^{\circ}\text{C}$ increase        | -0.04 | 0.01                                 | -0.06 to -0.02     | <0.001  | -0.16   | 100                        |
|                                                                                 |       | <b><i>R<sup>2</sup></i></b>          | <b><i>0.32</i></b> |         |         | <b><i>0.28 to 0.37</i></b> |
|                                                                                 |       | <b><i>Adjusted R<sup>2</sup></i></b> | <b><i>0.31</i></b> |         |         | <b><i>0.27 to 0.35</i></b> |

Abbreviations: R<sup>2</sup>, R squared; B, coefficient in the linear regression model; SE, standard error; CI, confidence interval;  $\beta$ , standardized  $\beta$ -coefficient in the linear regression model; CRT, capillary refill time;  $\Delta\text{Tc-p}$ , central-to-peripheral temperature difference.

**e-Figure 1.** Linear relationship between cardiac output and heart rate

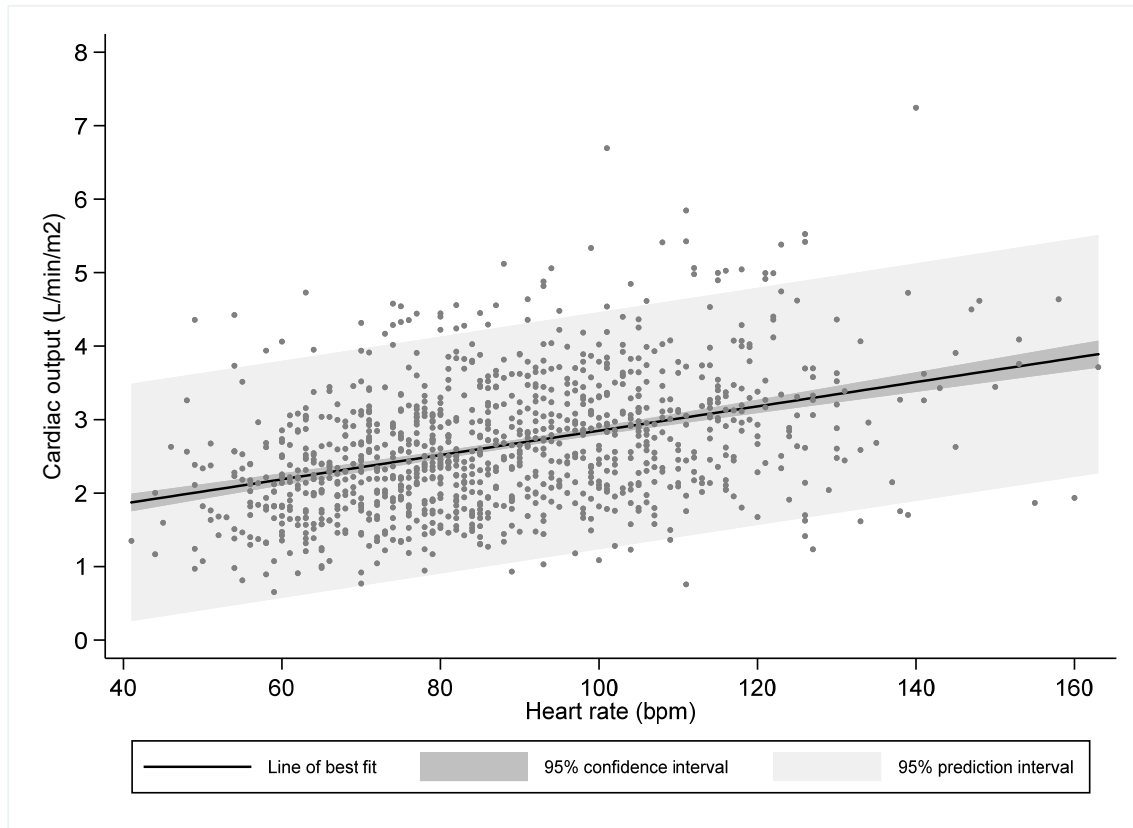

**e-Figure 2.** Kernel plot of standardized residuals

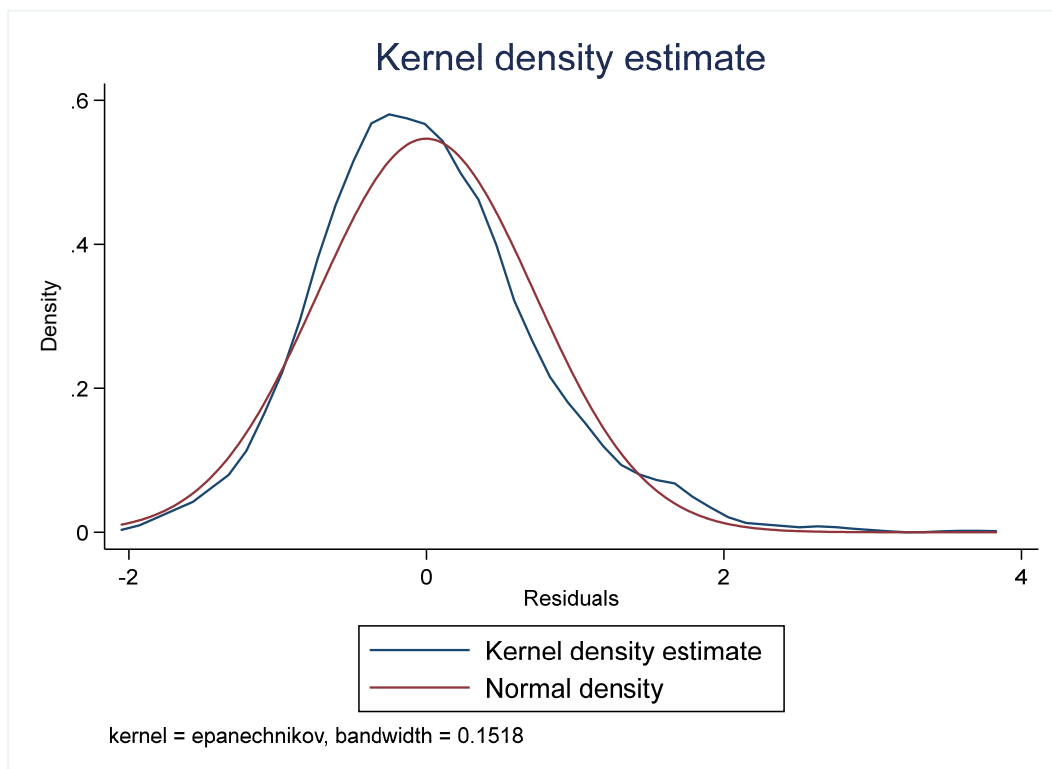

Comment: the Kernel density estimate of the multivariable regression model closely follows the distribution of a normal density plot

**e-Figure 3.** Probability P-P Plot of the residuals

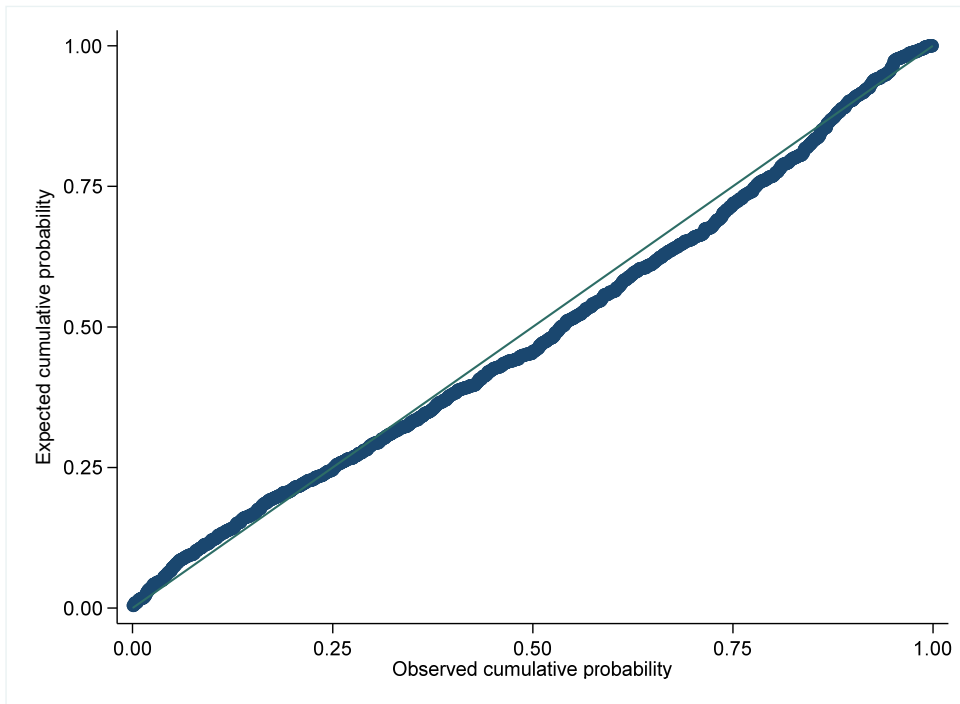

Comment: there is some deviation in the center of the plot, but we still assume normality as there are no drastic deviations from the diagonal (normality) line.

**e-Figure 4.** Scatterplot of the residuals

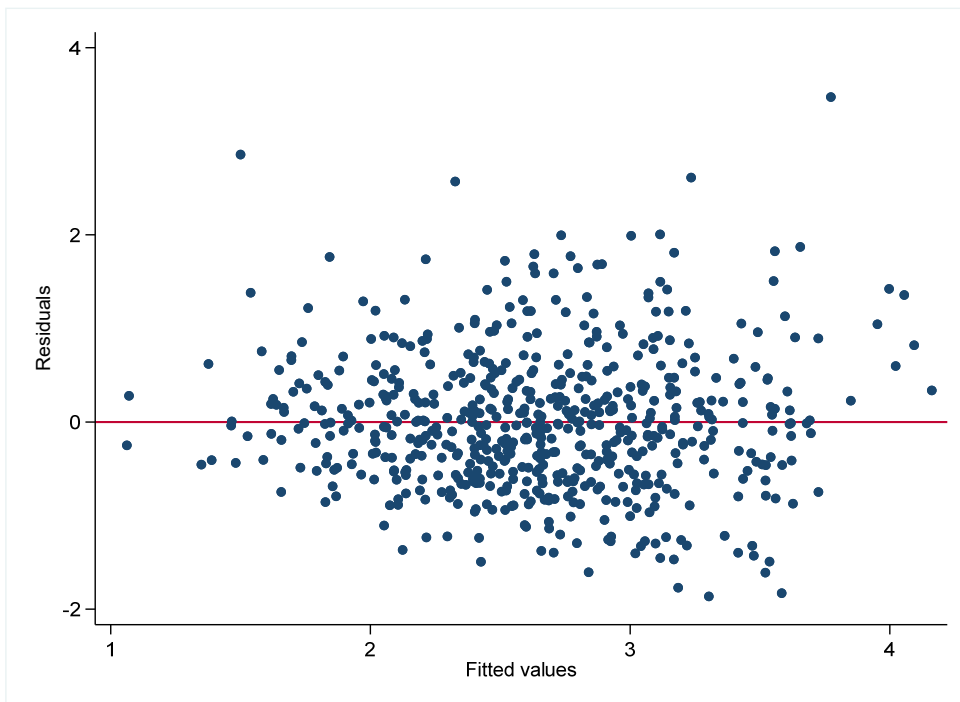

Comment: the scatterplot of the residuals shows no clear pattern to the residuals plotted against the fitted values. Therefore, we assume homoscedasticity of the residuals.

e-Table 4. Variance inflation factors and tolerance

| Variable                                                                              | Variance inflation factor | Tolerance |
|---------------------------------------------------------------------------------------|---------------------------|-----------|
| <b>Covariates</b>                                                                     |                           |           |
| Male gender                                                                           | 1.01                      | 0.99      |
| Mechanical ventilation                                                                | 1.21                      | 0.83      |
| Norepinephrine dose per $\mu\text{g}\cdot\text{kg}^{-1}\cdot\text{min}^{-1}$ increase | 1.29                      | 0.78      |
| <b>Clinical signs reflecting the central circulation</b>                              |                           |           |
| Respiratory rate per minute increase                                                  | 1.18                      | 0.85      |
| Heart rate in beats per minute                                                        | 1.27                      | 0.78      |
| Atrial fibrillation                                                                   | 1.05                      | 0.96      |
| Systolic blood pressure per mmHg increase                                             | 1.61                      | 0.62      |
| Diastolic blood pressure per mmHg increase                                            | 1.49                      | 0.67      |
| Cardiac murmurs                                                                       | 1.02                      | 0.98      |
| <b>Clinical signs reflecting organ perfusion</b>                                      |                           |           |
| CRT on the sternum per sec increase                                                   | 1.14                      | 0.88      |
| $\Delta\text{Tc-p}$ , central to big toe per $^{\circ}\text{C}$ increase              | 1.13                      | 0.89      |

Comment: there are no signs for multicollinearity, as none of the variables has a variance inflation factor that exceeds 10 or a tolerance below 0.1.

e-Table 5. Independent predictors of cardiac output on complete cases (non-imputed data)

| Variable                                                                              | B                                | SE          | 95% CI         | P value | $\beta$ |
|---------------------------------------------------------------------------------------|----------------------------------|-------------|----------------|---------|---------|
| <b>Covariates</b>                                                                     |                                  |             |                |         |         |
| Male gender                                                                           | -0.24                            | 0.06        | -0.36 to -0.11 | <0.001  | -0.13   |
| Mechanical ventilation                                                                | -0.17                            | 0.07        | -0.30 to -0.04 | 0.012   | -0.09   |
| Norepinephrine dose per $\mu\text{g}\cdot\text{kg}^{-1}\cdot\text{min}^{-1}$ increase | 0.16                             | 0.20        | -0.22 to 0.55  | 0.407   | 0.03    |
| <b>Clinical signs reflecting the central circulation</b>                              |                                  |             |                |         |         |
| Respiratory rate per minute increase                                                  | -0.02                            | 0.01        | -0.03 to -0.01 | 0.001   | -0.12   |
| Heart rate in beats per minute                                                        | 0.02                             | 0.00        | 0.02 to 0.02   | <0.001  | 0.46    |
| Atrial fibrillation                                                                   | -0.52                            | 0.14        | -0.79 to -0.25 | <0.001  | -0.13   |
| Systolic blood pressure per mmHg increase                                             | 0.01                             | 0.00        | 0.01 to 0.01   | <0.001  | 0.28    |
| Diastolic blood pressure per mmHg increase                                            | -0.02                            | 0.00        | -0.02 to -0.01 | <0.001  | -0.21   |
| Cardiac murmurs                                                                       | 0.24                             | 0.10        | 0.04 to 0.45   | 0.020   | 0.08    |
| <b>Clinical signs reflecting organ perfusion</b>                                      |                                  |             |                |         |         |
| CRT on the sternum per sec increase                                                   | -0.09                            | 0.03        | -0.15 to -0.03 | 0.003   | -0.11   |
| $\Delta\text{Tc-p}$ , central to big toe per $^{\circ}\text{C}$ increase              | -0.04                            | 0.01        | -0.06 to -0.02 | <0.001  | -0.16   |
|                                                                                       | <b><math>R^2</math></b>          | <b>0.34</b> |                |         |         |
|                                                                                       | <b>Adjusted <math>R^2</math></b> | <b>0.32</b> |                |         |         |

All patients with complete data were included. The model included 595 patients. Abbreviations:  $R^2$ , R squared; CI, confidence interval;  $\beta$ , standardised  $\beta$ -coefficient in the linear regression model; CRT, capillary refill time.

## Secondary analysis: diagnostic performance

e-Table 6. Significant associations for different cardiac index cut-off values using multivariable logistic regression

| Variable                                                        | Odds ratio | 95% CI      | P-value | Independent contribution %    |
|-----------------------------------------------------------------|------------|-------------|---------|-------------------------------|
| <b>Cardiac index &lt; 2.2 L·min<sup>-1</sup>·m<sup>-2</sup></b> |            |             |         | <i>AUC 0.74 (0.70 - 0.78)</i> |
| Gender                                                          | 1.62       | 1.16 - 2.27 | 0.005   | 4                             |
| Noradrenaline dose per µg·kg <sup>-1</sup> ·min <sup>-1</sup>   | 1.69       | 0.63 - 4.53 | 0.296   | 1                             |
| <b>Central circulation</b>                                      |            |             |         |                               |
| Respiratory rate per minute                                     | 1.04       | 1.01 - 1.07 | 0.021   | 2                             |
| Heart rate in beats per minute                                  | 0.96       | 0.95 - 0.97 | <0.001  | 46                            |
| Atrial fibrillation                                             | 2.42       | 1.31 - 4.46 | 0.005   | 3                             |
| Systolic blood pressure per mmHg                                | 0.98       | 0.97 - 0.99 | <0.001  | 14                            |
| Diastolic blood pressure per mmHg                               | 1.04       | 1.02 - 1.06 | <0.001  | 8                             |
| <b>Organ perfusion</b>                                          |            |             |         |                               |
| CRT on the sternum per sec                                      | 1.17       | 1.00 - 1.37 | 0.046   | 8                             |
| ΔTc-p, central to big toe per °C                                | 1.10       | 1.05 - 1.15 | <0.001  | 15                            |
| <b>Cardiac index &lt; 2.5 L·min<sup>-1</sup>·m<sup>-2</sup></b> |            |             |         | <i>AUC 0.76 (0.72 - 0.79)</i> |
| Gender                                                          | 1.53       | 1.10 - 2.11 | 0.011   | 3                             |
| Noradrenaline dose per µg·kg <sup>-1</sup> ·min <sup>-1</sup>   | 1.01       | 0.38 - 2.66 | 0.989   | 1                             |
| <b>Central circulation</b>                                      |            |             |         |                               |
| Respiratory rate per minute                                     | 1.04       | 1.00 - 1.07 | 0.024   | 2                             |
| Heart rate in beats per minute                                  | 0.96       | 0.95 - 0.97 | <0.001  | 50                            |
| Atrial fibrillation                                             | 2.34       | 1.25 - 4.36 | 0.008   | 2                             |
| Systolic blood pressure per mmHg                                | 0.97       | 0.97 - 0.98 | <0.001  | 15                            |
| Diastolic blood pressure per mmHg                               | 1.04       | 1.02 - 1.06 | <0.001  | 5                             |
| <b>Organ perfusion</b>                                          |            |             |         |                               |
| CRT on the sternum per sec                                      | 1.23       | 1.05 - 1.46 | 0.012   | 8                             |
| ΔTc-p, central to big toe per °C                                | 1.11       | 1.06 - 1.16 | <0.001  | 14                            |
| <b>Cardiac index &gt; 4.0 L·min<sup>-1</sup>·m<sup>-2</sup></b> |            |             |         | <i>AUC 0.75 (0.69 - 0.81)</i> |
| Noradrenaline dose per µg·kg <sup>-1</sup> ·min <sup>-1</sup>   | 2.89       | 0.88 - 9.44 | 0.080   | 5                             |
| Heart rate in beats per minute                                  | 1.04       | 1.03 - 1.05 | <0.001  | 66                            |
| Systolic blood pressure per mmHg                                | 1.01       | 1.00 - 1.02 | 0.044   | 9                             |
| ΔTc-p, central to foot per °C                                   | 0.86       | 0.78 - 0.94 | 0.001   | 20                            |
| <b>Cardiac index &gt; 4.5 L·min<sup>-1</sup>·m<sup>-2</sup></b> |            |             |         | <i>AUC 0.86 (0.79 - 0.93)</i> |
| Noradrenaline dose per µg·kg <sup>-1</sup> ·min <sup>-1</sup>   | 2.47       | 0.49 - 12.4 | 0.272   | 4                             |
| Heart rate in beats per minute                                  | 1.06       | 1.04 - 1.09 | <0.001  | 70                            |
| Systolic blood pressure per mmHg                                | 1.02       | 1.00 - 1.03 | 0.026   | 6                             |
| ΔTc-p, central to foot per °C                                   | 0.83       | 0.72 - 0.96 | 0.011   | 21                            |

The models included all 783 patients with validated cardiac index measurements. Abbreviations: CRT, capillary refill time; ΔTc-p, central-to-peripheral temperature difference; AUC, area under the receiver-operating-curve.



**e-Fig 5.** Calibration plots of all 4 multivariable logistic regression models: observed versus predicted cardiac index across 10 equally sized groups

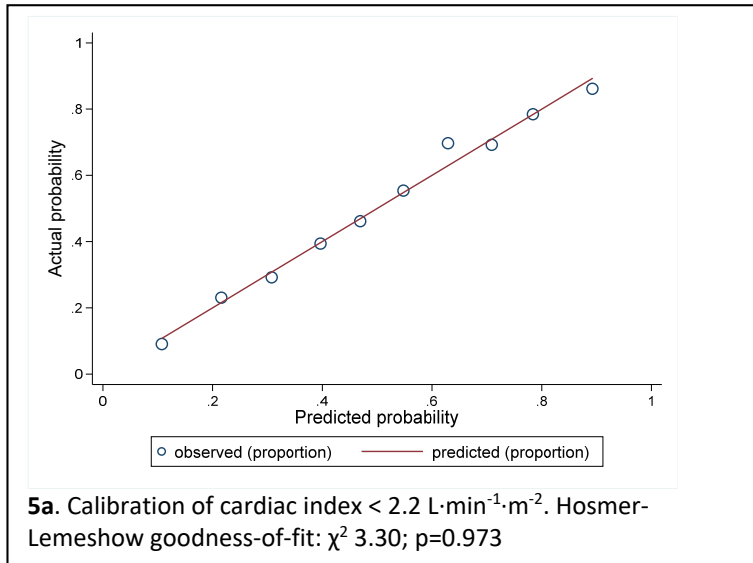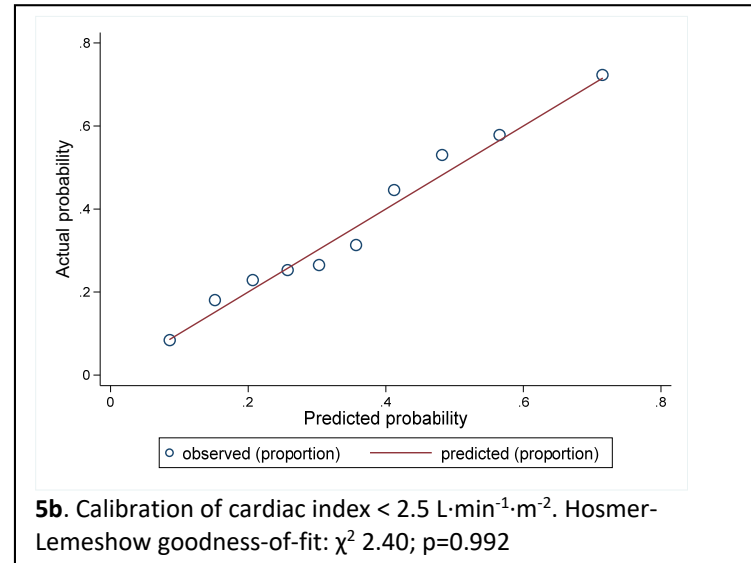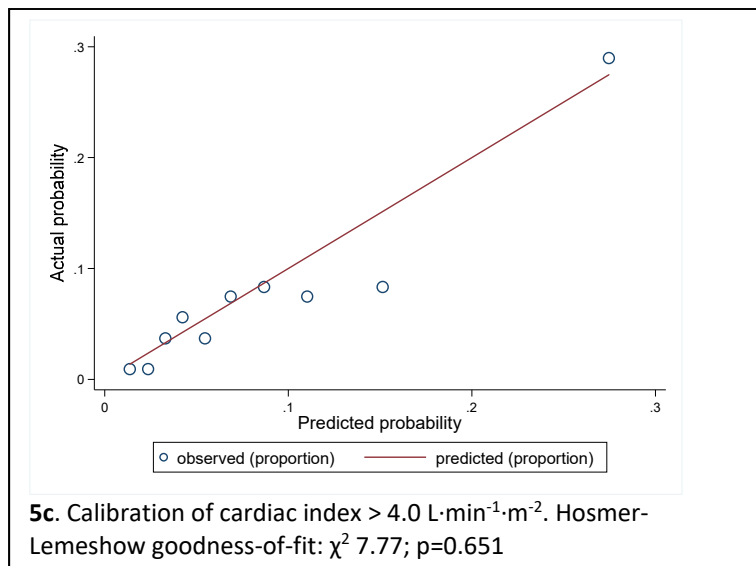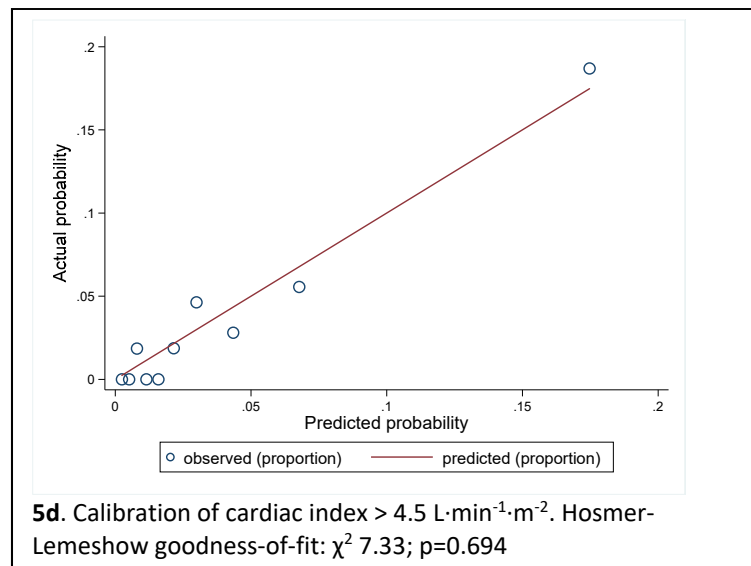

**e-Table 7a.** Diagnosing a low cardiac index: tabular display derived from the 2x2 matrix for each clinical sign

| Results for each clinical sign                         | N   | Cardiac index < 2.2 L·min <sup>-1</sup> ·m <sup>-2</sup> |                    |                    |                   | Cardiac index < 2.5 L·min <sup>-1</sup> ·m <sup>-2</sup> |                    |                    |                   |
|--------------------------------------------------------|-----|----------------------------------------------------------|--------------------|--------------------|-------------------|----------------------------------------------------------|--------------------|--------------------|-------------------|
|                                                        |     | A = True positive                                        | B = False positive | C = False negative | D = True negative | A = True positive                                        | B = False positive | C = False negative | D = True negative |
| <i>Central circulation</i>                             |     |                                                          |                    |                    |                   |                                                          |                    |                    |                   |
| Respiratory rate > 22 pm                               | 783 | 216                                                      | 334                | 64                 | 169               | 286                                                      | 264                | 99                 | 134               |
| Heart rate < 100 bpm                                   | 783 | 229                                                      | 342                | 51                 | 161               | 314                                                      | 257                | 71                 | 141               |
| Atrial fibrillation                                    | 783 | 26                                                       | 30                 | 254                | 473               | 33                                                       | 23                 | 352                | 375               |
| SBP < 90 mmHg                                          | 783 | 18                                                       | 38                 | 262                | 465               | 28                                                       | 28                 | 357                | 370               |
| DBP < 45 mmHg                                          | 783 | 13                                                       | 27                 | 267                | 476               | 21                                                       | 19                 | 364                | 379               |
| MAP < 65 mmHg                                          | 783 | 32                                                       | 65                 | 248                | 438               | 49                                                       | 48                 | 336                | 350               |
| Cardiac murmurs                                        | 783 | 18                                                       | 57                 | 262                | 446               | 30                                                       | 45                 | 355                | 353               |
| Crepitations                                           | 783 | 36                                                       | 79                 | 244                | 424               | 49                                                       | 66                 | 336                | 332               |
| <i>Organ perfusion</i>                                 |     |                                                          |                    |                    |                   |                                                          |                    |                    |                   |
| Consciousness                                          |     |                                                          |                    |                    |                   |                                                          |                    |                    |                   |
| reacting to voice                                      | 783 | 31                                                       | 90                 | 249                | 413               | 47                                                       | 74                 | 338                | 324               |
| reacting to pain                                       | 783 | 14                                                       | 19                 | 266                | 484               | 18                                                       | 15                 | 367                | 383               |
| unresponsive                                           | 783 | 19                                                       | 31                 | 261                | 472               | 26                                                       | 24                 | 359                | 374               |
| Urine output <0.5 ml·kg <sup>-1</sup> ·h <sup>-1</sup> |     |                                                          |                    |                    |                   |                                                          |                    |                    |                   |
| Over 1 hour                                            | 783 | 132                                                      | 213                | 148                | 290               | 183                                                      | 162                | 202                | 236               |
| Over 6 hours                                           | 783 | 111                                                      | 177                | 169                | 326               | 153                                                      | 135                | 232                | 263               |
| Skin temperature cold*                                 |     |                                                          |                    |                    |                   |                                                          |                    |                    |                   |
| ΔTc-p, dorsum foot                                     | 783 | 182                                                      | 220                | 98                 | 283               | 237                                                      | 165                | 148                | 233               |
| ΔTc-p, big toe                                         | 783 | 217                                                      | 304                | 63                 | 199               | 290                                                      | 231                | 95                 | 167               |
| Cold subjective                                        | 785 | 132                                                      | 153                | 148                | 352               | 175                                                      | 110                | 210                | 288               |
| CRT prolonged**                                        |     |                                                          |                    |                    |                   |                                                          |                    |                    |                   |
| Sternum                                                | 783 | 29                                                       | 33                 | 251                | 470               | 39                                                       | 23                 | 346                | 375               |
| Finger                                                 | 783 | 71                                                       | 76                 | 209                | 427               | 88                                                       | 59                 | 297                | 339               |
| Knee                                                   | 783 | 92                                                       | 107                | 188                | 396               | 118                                                      | 81                 | 267                | 317               |
| Skin mottling severity***                              |     |                                                          |                    |                    |                   |                                                          |                    |                    |                   |
| Over the knee (≥3)                                     | 783 | 45                                                       | 47                 | 235                | 456               | 53                                                       | 39                 | 332                | 359               |
| Severe (≥4)                                            | 783 | 9                                                        | 14                 | 271                | 489               | 12                                                       | 11                 | 373                | 387               |

\*ΔTc-p was considered cold if >7 °C. \*\*CRT was considered prolonged if >4.5 seconds. \*\*\*Mottling was scored according to Ait-Oufella et al. Abbreviations: SBP, systolic blood pressure; DBP, diastolic blood pressure; MAP, mean arterial pressure; ΔTc-p, central-to-peripheral temperature difference; CRT, capillary refill time.

**e-Table 7b.** Diagnosing a low cardiac index: Outcome measures for each clinical sign

| Performance of each clinical sign                      | Cardiac index < 2.2 L·min <sup>-1</sup> ·m <sup>-2</sup> |       |      |      |          |      |      | Cardiac index < 2.5 L·min <sup>-1</sup> ·m <sup>-2</sup> |       |      |      |          |      |      |
|--------------------------------------------------------|----------------------------------------------------------|-------|------|------|----------|------|------|----------------------------------------------------------|-------|------|------|----------|------|------|
|                                                        | Sens.                                                    | Spec. | PPV  | NPV  | Accuracy | LR + | LR - | Sens.                                                    | Spec. | PPV  | NPV  | Accuracy | LR + | LR - |
| <i>Central circulation</i>                             |                                                          |       |      |      |          |      |      |                                                          |       |      |      |          |      |      |
| Respiratory rate > 22 pm                               | 0.77                                                     | 0.34  | 0.39 | 0.73 | 0.49     | 1.16 | 0.68 | 0.74                                                     | 0.34  | 0.52 | 0.58 | 0.54     | 1.12 | 0.76 |
| Heart rate < 100 bpm                                   | 0.82                                                     | 0.32  | 0.40 | 0.76 | 0.50     | 1.20 | 0.57 | 0.82                                                     | 0.35  | 0.55 | 0.67 | 0.58     | 1.26 | 0.52 |
| Atrial fibrillation                                    | 0.09                                                     | 0.94  | 0.46 | 0.65 | 0.64     | 1.56 | 0.96 | 0.09                                                     | 0.94  | 0.59 | 0.53 | 0.52     | 1.48 | 0.97 |
| SBP < 90 mmHg                                          | 0.06                                                     | 0.92  | 0.32 | 0.64 | 0.62     | 0.85 | 1.01 | 0.07                                                     | 0.93  | 0.50 | 0.49 | 0.51     | 1.03 | 1.00 |
| DBP < 45 mmHg                                          | 0.05                                                     | 0.95  | 0.33 | 0.64 | 0.62     | 0.86 | 1.01 | 0.05                                                     | 0.95  | 0.53 | 0.52 | 0.51     | 1.14 | 0.99 |
| MAP < 65 mmHg                                          | 0.11                                                     | 0.87  | 0.33 | 0.64 | 0.60     | 0.88 | 1.02 | 0.13                                                     | 0.88  | 0.51 | 0.49 | 0.51     | 1.06 | 0.99 |
| Cardiac murmurs                                        | 0.06                                                     | 0.89  | 0.31 | 0.63 | 0.59     | 0.57 | 1.06 | 0.08                                                     | 0.89  | 0.40 | 0.50 | 0.49     | 0.69 | 1.04 |
| Crepitations                                           | 0.13                                                     | 0.84  | 0.31 | 0.63 | 0.59     | 0.82 | 1.03 | 0.13                                                     | 0.83  | 0.43 | 0.00 | 0.49     | 0.77 | 1.05 |
| <i>Organ perfusion</i>                                 |                                                          |       |      |      |          |      |      |                                                          |       |      |      |          |      |      |
| Consciousness                                          |                                                          |       |      |      |          |      |      |                                                          |       |      |      |          |      |      |
| reacting to voice                                      | 0.11                                                     | 0.82  | 0.26 | 0.61 | 0.57     | 0.62 | 1.08 | 0.12                                                     | 0.81  | 0.39 | 0.51 | 0.47     | 0.66 | 1.08 |
| reacting to pain                                       | 0.05                                                     | 0.96  | 0.42 | 0.65 | 0.64     | 1.32 | 0.99 | 0.05                                                     | 0.96  | 0.55 | 0.51 | 0.51     | 1.24 | 0.99 |
| unresponsive                                           | 0.07                                                     | 0.94  | 0.38 | 0.64 | 0.63     | 1.10 | 0.99 | 0.07                                                     | 0.94  | 0.52 | 0.54 | 0.51     | 1.12 | 0.99 |
| Urine output <0.5 ml·kg <sup>-1</sup> ·h <sup>-1</sup> |                                                          |       |      |      |          |      |      |                                                          |       |      |      |          |      |      |
| Over 1 hour                                            | 0.47                                                     | 0.58  | 0.38 | 0.66 | 0.54     | 1.11 | 0.92 | 0.48                                                     | 0.59  | 0.53 | 0.53 | 0.54     | 1.17 | 0.88 |
| Over 6 hours                                           | 0.40                                                     | 0.65  | 0.39 | 0.66 | 0.56     | 1.13 | 0.93 | 0.40                                                     | 0.66  | 0.53 | 0.61 | 0.53     | 1.17 | 0.91 |
| Skin temperature cold*                                 |                                                          |       |      |      |          |      |      |                                                          |       |      |      |          |      |      |
| Δ-T, dorsum foot                                       | 0.78                                                     | 0.40  | 0.42 | 0.76 | 0.63     | 1.28 | 0.57 | 0.62                                                     | 0.59  | 0.59 | 0.64 | 0.60     | 1.48 | 0.66 |
| Δ-T, big toe                                           | 0.65                                                     | 0.56  | 0.45 | 0.74 | 0.59     | 1.49 | 0.62 | 0.75                                                     | 0.42  | 0.56 | 0.58 | 0.58     | 1.30 | 0.59 |
| Cold subjective                                        | 0.47                                                     | 0.70  | 0.46 | 0.70 | 0.62     | 1.56 | 0.76 | 0.45                                                     | 0.72  | 0.61 | 0.52 | 0.59     | 1.64 | 0.75 |
| CRT prolonged**                                        |                                                          |       |      |      |          |      |      |                                                          |       |      |      |          |      |      |
| Sternum                                                | 0.10                                                     | 0.93  | 0.47 | 0.65 | 0.64     | 1.58 | 0.96 | 0.10                                                     | 0.94  | 0.63 | 0.53 | 0.53     | 1.75 | 0.95 |
| Finger                                                 | 0.25                                                     | 0.85  | 0.48 | 0.67 | 0.64     | 1.68 | 0.88 | 0.23                                                     | 0.85  | 0.60 | 0.54 | 0.55     | 1.54 | 0.91 |
| Knee                                                   | 0.33                                                     | 0.79  | 0.46 | 0.68 | 0.62     | 1.54 | 0.85 | 0.31                                                     | 0.80  | 0.59 | 0.52 | 0.56     | 1.51 | 0.87 |
| Skin mottling severity***                              |                                                          |       |      |      |          |      |      |                                                          |       |      |      |          |      |      |
| Over the knee (≥3)                                     | 0.16                                                     | 0.91  | 0.49 | 0.66 | 0.64     | 1.72 | 0.93 | 0.14                                                     | 0.90  | 0.58 | 0.51 | 0.53     | 1.40 | 0.96 |
| Severe (≥4)                                            | 0.03                                                     | 0.97  | 0.39 | 0.64 | 0.64     | 1.15 | 1.00 | 0.03                                                     | 0.97  | 0.52 | 0.50 | 0.51     | 1.13 | 1.00 |

\*ΔTc-p was considered cold if >7 °C. \*\*CRT was considered prolonged if >4.5 seconds. \*\*\*Mottling was scored according to Ait-Oufella et al. Abbreviations: Sens, sensitivity; Spec, specificity PPV, positive predictive value; NPV, negative predictive value; LR, likelihood ratio; SBP, systolic blood pressure; DBP, diastolic blood pressure; MAP, mean arterial pressure; ΔTc-p, central-to-peripheral temperature difference; CRT, capillary refill time.

**e-Table 8a.** Diagnosing a high cardiac index: tabular display derived from the 2x2 matrix for each clinical sign

| Results for each clinical sign                         | N   | Cardiac index > 4.0 L·min <sup>-1</sup> ·m <sup>-2</sup> |                    |                    |                   | Cardiac index > 4.5 L·min <sup>-1</sup> ·m <sup>-2</sup> |                    |                    |                   |
|--------------------------------------------------------|-----|----------------------------------------------------------|--------------------|--------------------|-------------------|----------------------------------------------------------|--------------------|--------------------|-------------------|
|                                                        |     | A = True positive                                        | B = False positive | C = False negative | D = True negative | A = True positive                                        | B = False positive | C = False negative | D = True negative |
| <b>Central circulation</b>                             |     |                                                          |                    |                    |                   |                                                          |                    |                    |                   |
| Respiratory rate > 22 pm                               | 783 | 43                                                       | 507                | 23                 | 210               | 20                                                       | 530                | 10                 | 223               |
| Heart rate < 100 bpm                                   | 783 | 30                                                       | 541                | 36                 | 176               | 8                                                        | 563                | 22                 | 190               |
| Atrial fibrillation                                    | 783 | 5                                                        | 51                 | 61                 | 666               | 0                                                        | 56                 | 30                 | 697               |
| SBP < 90 mmHg                                          | 783 | 6                                                        | 50                 | 60                 | 667               | 3                                                        | 53                 | 27                 | 700               |
| DBP < 45 mmHg                                          | 783 | 3                                                        | 37                 | 63                 | 680               | 2                                                        | 38                 | 28                 | 715               |
| MAP < 65 mmHg                                          | 783 | 9                                                        | 88                 | 57                 | 629               | 5                                                        | 92                 | 25                 | 661               |
| Cardiac murmurs                                        | 783 | 11                                                       | 64                 | 55                 | 653               | 5                                                        | 70                 | 25                 | 683               |
| Crepitations                                           | 783 | 14                                                       | 101                | 52                 | 616               | 5                                                        | 110                | 25                 | 643               |
| <b>Organ perfusion</b>                                 |     |                                                          |                    |                    |                   |                                                          |                    |                    |                   |
| Consciousness                                          |     |                                                          |                    |                    |                   |                                                          |                    |                    |                   |
| reacting to voice                                      | 783 | 16                                                       | 105                | 50                 | 612               | 7                                                        | 114                | 23                 | 639               |
| reacting to pain                                       | 783 | 4                                                        | 29                 | 62                 | 688               | 2                                                        | 31                 | 28                 | 722               |
| unresponsive                                           | 583 | 6                                                        | 44                 | 60                 | 473               | 3                                                        | 47                 | 27                 | 706               |
| Urine output <0.5 ml·kg <sup>-1</sup> ·h <sup>-1</sup> |     |                                                          |                    |                    |                   |                                                          |                    |                    |                   |
| Over 1 hour                                            | 783 | 28                                                       | 317                | 38                 | 400               | 11                                                       | 334                | 19                 | 419               |
| Over 6 hours                                           | 783 | 23                                                       | 265                | 43                 | 452               | 11                                                       | 277                | 19                 | 476               |
| Skin temperature cold*                                 |     |                                                          |                    |                    |                   |                                                          |                    |                    |                   |
| ΔTc-p, dorsum foot                                     | 783 | 23                                                       | 379                | 43                 | 338               | 10                                                       | 392                | 20                 | 361               |
| ΔTc-p, big toe                                         | 783 | 31                                                       | 490                | 35                 | 227               | 15                                                       | 506                | 15                 | 247               |
| Cold subjective                                        | 783 | 17                                                       | 268                | 49                 | 449               | 7                                                        | 278                | 23                 | 475               |
| CRT prolonged***                                       |     |                                                          |                    |                    |                   |                                                          |                    |                    |                   |
| Sternum                                                | 783 | 2                                                        | 60                 | 64                 | 657               | 1                                                        | 61                 | 29                 | 692               |
| Finger                                                 | 783 | 10                                                       | 137                | 56                 | 580               | 6                                                        | 141                | 24                 | 612               |
| Knee                                                   | 783 | 13                                                       | 186                | 53                 | 531               | 7                                                        | 192                | 23                 | 561               |
| Skin mottling severity***                              |     |                                                          |                    |                    |                   |                                                          |                    |                    |                   |
| Over the knee (≥3)                                     | 783 | 7                                                        | 85                 | 59                 | 632               | 3                                                        | 89                 | 27                 | 664               |
| Severe (≥4)                                            | 783 | 1                                                        | 22                 | 65                 | 695               | 0                                                        | 23                 | 30                 | 730               |

\*ΔTc-p was considered cold if >7 °C. \*\*CRT was considered prolonged if >4.5 seconds. \*\*\*Mottling was scored according to Ait-Oufella et al. Abbreviations: SBP, systolic blood pressure; DBP, diastolic blood pressure; MAP, mean arterial pressure; ΔTc-p, central-to-peripheral temperature difference; CRT, capillary refill time.

**e-Table 8b.** Diagnosing a high cardiac index: Outcome measures for each clinical sign

| Performance of each clinical sign                      | Cardiac index > 4.0 L·min <sup>-1</sup> ·m <sup>-2</sup> |       |      |      |          |      |      | Cardiac index > 4.5 L·min <sup>-1</sup> ·m <sup>-2</sup> |       |      |      |          |      |      |
|--------------------------------------------------------|----------------------------------------------------------|-------|------|------|----------|------|------|----------------------------------------------------------|-------|------|------|----------|------|------|
|                                                        | Sens.                                                    | Spec. | PPV  | NPV  | Accuracy | LR + | LR - | Sens.                                                    | Spec. | PPV  | NPV  | Accuracy | LR + | LR - |
| <b>Central circulation</b>                             |                                                          |       |      |      |          |      |      |                                                          |       |      |      |          |      |      |
| Respiratory rate > 22 pm                               | 0.65                                                     | 0.29  | 0.08 | 0.90 | 0.32     | 0.92 | 1.19 | 0.67                                                     | 0.30  | 0.04 | 0.96 | 0.31     | 0.95 | 1.13 |
| Heart rate < 100 bpm                                   | 0.45                                                     | 0.25  | 0.05 | 0.83 | 0.26     | 0.60 | 2.22 | 0.27                                                     | 0.25  | 0.01 | 0.90 | 0.25     | 0.36 | 2.91 |
| Atrial fibrillation                                    | 0.08                                                     | 0.93  | 0.09 | 0.92 | 0.86     | 1.07 | 1.00 | 0.00                                                     | 0.93  | 0.00 | 0.96 | 0.89     | 0.00 | 1.08 |
| SBP < 90 mmHg                                          | 0.09                                                     | 0.93  | 0.11 | 0.92 | 0.86     | 1.30 | 0.98 | 0.10                                                     | 0.93  | 0.05 | 0.96 | 0.90     | 1.42 | 0.97 |
| DBP < 45 mmHg                                          | 0.05                                                     | 0.95  | 0.08 | 0.92 | 0.87     | 0.88 | 1.01 | 0.07                                                     | 0.95  | 0.05 | 0.96 | 0.92     | 1.32 | 0.98 |
| MAP < 65 mmHg                                          | 0.14                                                     | 0.88  | 0.09 | 0.92 | 0.81     | 1.11 | 0.98 | 0.17                                                     | 0.88  | 0.05 | 0.96 | 0.85     | 1.36 | 0.95 |
| Cardiac murmurs                                        | 0.17                                                     | 0.91  | 0.15 | 0.92 | 0.85     | 1.87 | 0.92 | 0.17                                                     | 0.91  | 0.07 | 0.96 | 0.88     | 1.79 | 0.92 |
| Crepitations                                           | 0.21                                                     | 0.86  | 0.12 | 0.92 | 0.80     | 1.51 | 0.92 | 0.17                                                     | 0.85  | 0.04 | 0.00 | 0.83     | 1.14 | 0.98 |
| <b>Organ perfusion</b>                                 |                                                          |       |      |      |          |      |      |                                                          |       |      |      |          |      |      |
| Consciousness                                          |                                                          |       |      |      |          |      |      |                                                          |       |      |      |          |      |      |
| reacting to voice                                      | 0.24                                                     | 0.85  | 0.13 | 0.92 | 0.80     | 1.66 | 0.89 | 0.23                                                     | 0.85  | 0.06 | 0.96 | 0.83     | 1.54 | 0.90 |
| reacting to pain                                       | 0.06                                                     | 0.96  | 0.12 | 0.92 | 0.88     | 1.50 | 0.98 | 0.07                                                     | 0.96  | 0.06 | 0.97 | 0.92     | 1.62 | 0.97 |
| unresponsive                                           | 0.09                                                     | 0.91  | 0.12 | 0.89 | 0.82     | 1.07 | 0.99 | 0.10                                                     | 0.94  | 0.06 | 0.96 | 0.91     | 1.60 | 0.96 |
| Urine output <0.5 ml·kg <sup>-1</sup> ·h <sup>-1</sup> |                                                          |       |      |      |          |      |      |                                                          |       |      |      |          |      |      |
| Over 1 hour                                            | 0.42                                                     | 0.56  | 0.08 | 0.91 | 0.55     | 0.96 | 1.03 | 0.37                                                     | 0.56  | 0.03 | 0.96 | 0.55     | 0.83 | 1.14 |
| Over 6 hours                                           | 0.35                                                     | 0.63  | 0.08 | 0.91 | 0.61     | 0.94 | 1.03 | 0.37                                                     | 0.63  | 0.04 | 0.96 | 0.62     | 1.00 | 1.00 |
| Skin temperature cold*                                 |                                                          |       |      |      |          |      |      |                                                          |       |      |      |          |      |      |
| Δ-T, dorsum foot                                       | 0.47                                                     | 0.32  | 0.06 | 0.87 | 0.33     | 0.69 | 1.68 | 0.33                                                     | 0.48  | 0.02 | 0.96 | 0.47     | 0.64 | 1.39 |
| Δ-T, big toe                                           | 0.35                                                     | 0.47  | 0.06 | 0.89 | 0.46     | 0.66 | 1.38 | 0.50                                                     | 0.33  | 0.03 | 0.95 | 0.33     | 0.74 | 1.52 |
| Cold subjective                                        | 0.26                                                     | 0.63  | 0.06 | 0.90 | 0.60     | 0.69 | 1.19 | 0.23                                                     | 0.63  | 0.02 | 0.94 | 0.62     | 0.63 | 1.22 |
| CRT prolonged**                                        |                                                          |       |      |      |          |      |      |                                                          |       |      |      |          |      |      |
| Sternum                                                | 0.03                                                     | 0.92  | 0.03 | 0.91 | 0.84     | 0.36 | 1.06 | 0.03                                                     | 0.92  | 0.02 | 0.95 | 0.89     | 0.41 | 1.05 |
| Finger                                                 | 0.15                                                     | 0.81  | 0.07 | 0.91 | 0.75     | 0.79 | 1.05 | 0.20                                                     | 0.81  | 0.04 | 0.96 | 0.79     | 1.07 | 0.98 |
| Knee                                                   | 0.20                                                     | 0.74  | 0.07 | 0.91 | 0.69     | 0.76 | 1.08 | 0.23                                                     | 0.75  | 0.04 | 0.96 | 0.73     | 0.92 | 1.03 |
| Skin mottling severity***                              |                                                          |       |      |      |          |      |      |                                                          |       |      |      |          |      |      |
| Over the knee (≥3)                                     | 0.11                                                     | 0.88  | 0.08 | 0.91 | 0.82     | 0.89 | 1.01 | 0.10                                                     | 0.88  | 0.03 | 0.96 | 0.85     | 0.85 | 1.02 |
| Severe (≥4)                                            | 0.02                                                     | 0.97  | 0.04 | 0.91 | 0.89     | 0.49 | 1.02 | 0.00                                                     | 0.97  | 0.00 | 0.96 | 0.93     | 0.00 | 1.03 |

\*ΔTc-p was considered cold if >7 °C. \*\*CRT was considered prolonged if >4.5 seconds. \*\*\*Mottling was scored according to Ait-Oufella et al. Abbreviations: Sens, sensitivity; Spec, specificity PPV, positive predictive value; NPV, negative predictive value; LR, likelihood ratio; SBP, systolic blood pressure; DBP, diastolic blood pressure; MAP, mean arterial pressure; ΔTc-p, central-to-peripheral temperature difference.

e-Fig. 6: Diagnostic performance for clinical signs to diagnose a cardiac index above  $4.0 \text{ L}\cdot\text{min}^{-1}\cdot\text{m}^{-2}$

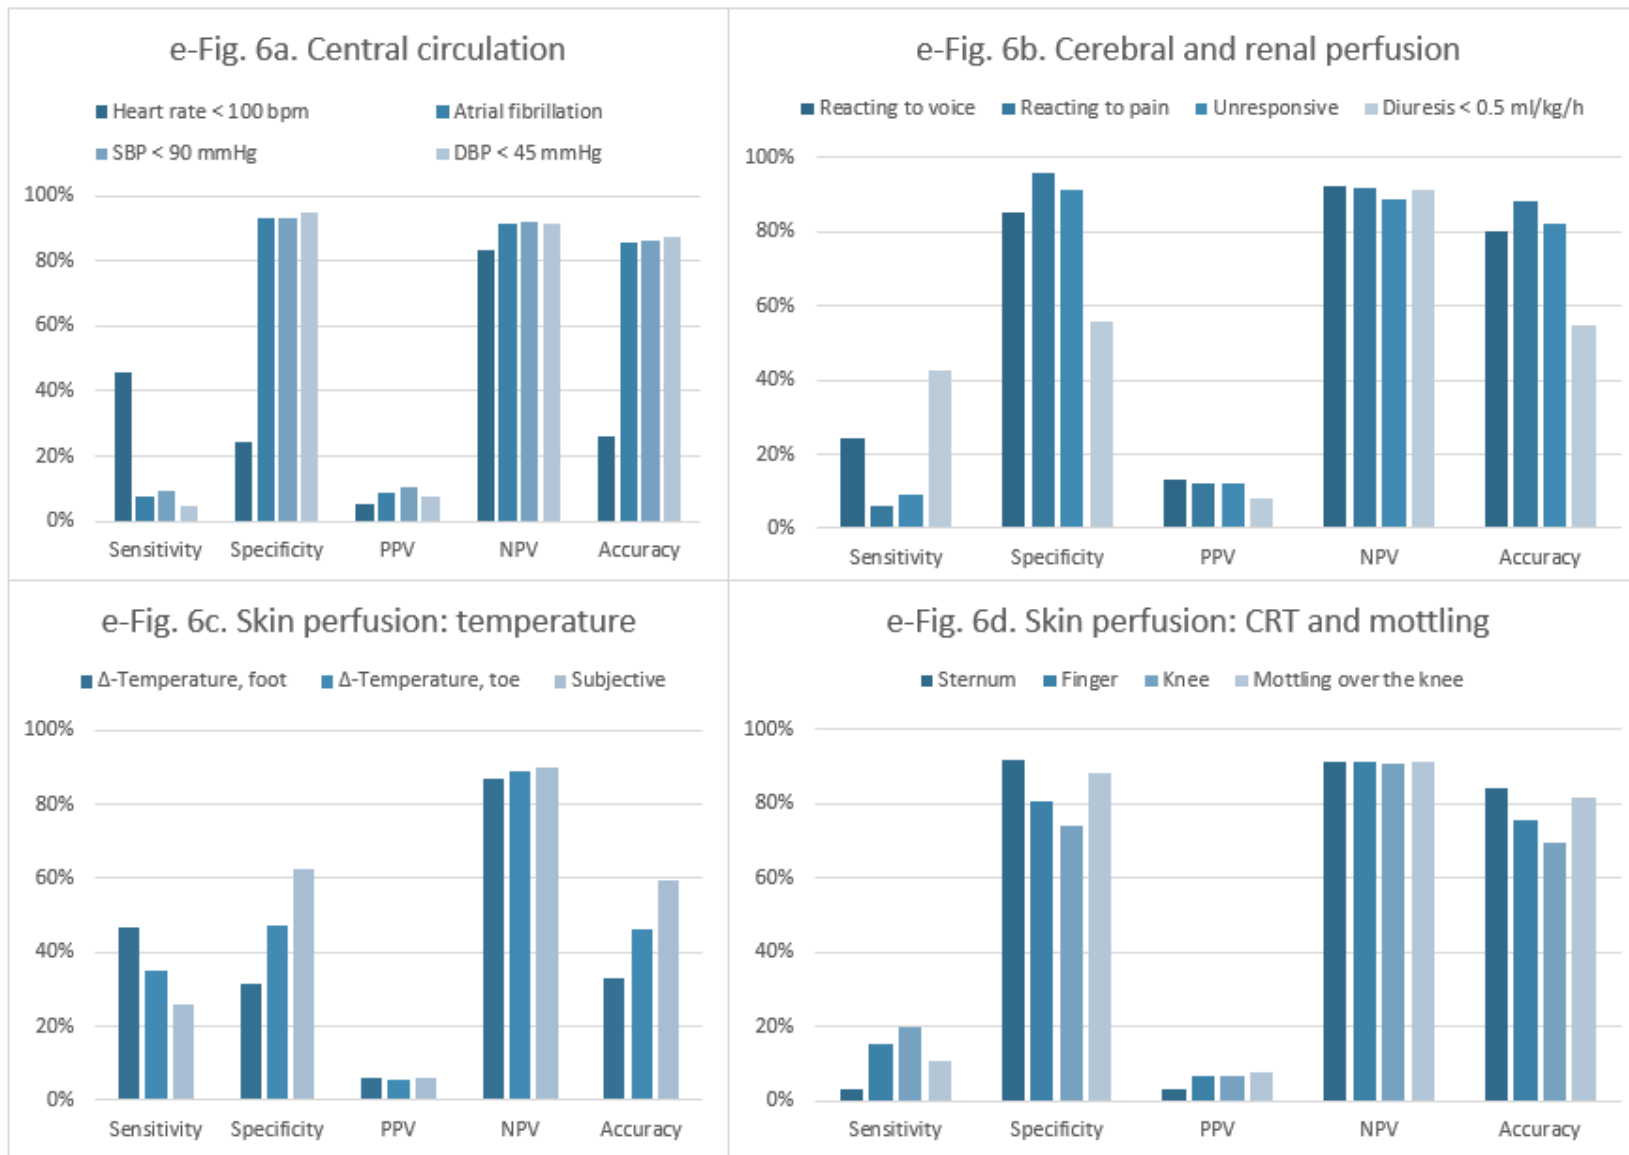

e-Fig. 7: Results for each clinical sign in subgroup analyses

|                                                     | Subgroup 1: split by norepinephrine          |             |     |     |          |                                           |             |     |     |          | Subgroup 2: clinically different groups |             |      |     |          |                                           |             |     |     |          |                                         |             |     |     |                                         |             |             |     |                                            |          |             |             |      |     |          |  |
|-----------------------------------------------------|----------------------------------------------|-------------|-----|-----|----------|-------------------------------------------|-------------|-----|-----|----------|-----------------------------------------|-------------|------|-----|----------|-------------------------------------------|-------------|-----|-----|----------|-----------------------------------------|-------------|-----|-----|-----------------------------------------|-------------|-------------|-----|--------------------------------------------|----------|-------------|-------------|------|-----|----------|--|
|                                                     | No norepinephrine<br>Prevalence 30%; n = 547 |             |     |     |          | Norepinephrine<br>Prevalence 39%; n = 528 |             |     |     |          | Heart failure<br>Prevalence 57%; n = 63 |             |      |     |          | Cardiac arrest<br>Prevalence 66%; n = 125 |             |     |     |          | Liver failure<br>Prevalence 15%; n = 54 |             |     |     | Septic shock<br>Prevalence 33%; n = 156 |             |             |     | CNS pathologies<br>Prevalence 33%; n = 144 |          |             |             |      |     |          |  |
|                                                     | Sensitivity                                  | Specificity | PPV | NPV | Accuracy | Sensitivity                               | Specificity | PPV | NPV | Accuracy | Sensitivity                             | Specificity | PPV  | NPV | Accuracy | Sensitivity                               | Specificity | PPV | NPV | Accuracy | Sensitivity                             | Specificity | PPV | NPV | Accuracy                                | Sensitivity | Specificity | PPV | NPV                                        | Accuracy | Sensitivity | Specificity | PPV  | NPV | Accuracy |  |
| <b>Central circulation</b>                          |                                              |             |     |     |          |                                           |             |     |     |          |                                         |             |      |     |          |                                           |             |     |     |          |                                         |             |     |     |                                         |             |             |     |                                            |          |             |             |      |     |          |  |
| Respiratory rate > 22                               | 68%                                          | 42%         | 33% | 76% | 50%      | 88%                                       | 20%         | 41% | 73% | 46%      | 81%                                     | 30%         | 60%  | 53% | 59%      | 96%                                       | 2%          | 65% | 25% | 64%      | 75%                                     | 46%         | 19% | 91% | 50%                                     | 98%         | 3%          | 33% | 75%                                        | 34%      | 74%         | 32%         | 35%  | 72% | 46%      |  |
| Heart rate                                          |                                              |             |     |     |          |                                           |             |     |     |          |                                         |             |      |     |          |                                           |             |     |     |          |                                         |             |     |     |                                         |             |             |     |                                            |          |             |             |      |     |          |  |
| < 100 bpm                                           | 83%                                          | 28%         | 33% | 80% | 45%      | 82%                                       | 42%         | 47% | 79% | 58%      | 64%                                     | 44%         | 61%  | 48% | 56%      | 95%                                       | 12%         | 67% | 56% | 66%      | 88%                                     | 30%         | 18% | 93% | 39%                                     | 63%         | 60%         | 43% | 77%                                        | 61%      | 96%         | 10%         | 34%  | 83% | 38%      |  |
| < 90 bpm                                            | 74%                                          | 42%         | 35% | 79% | 51%      | 73%                                       | 63%         | 56% | 79% | 67%      | 56%                                     | 56%         | 63%  | 48% | 56%      | 89%                                       | 23%         | 69% | 53% | 66%      | 75%                                     | 54%         | 22% | 93% | 57%                                     | 57%         | 82%         | 60% | 80%                                        | 74%      | 89%         | 19%         | 35%  | 78% | 42%      |  |
| < 80 bpm                                            | 55%                                          | 62%         | 38% | 76% | 60%      | 55%                                       | 76%         | 60% | 73% | 68%      | 36%                                     | 89%         | 81%  | 51% | 59%      | 70%                                       | 44%         | 70% | 43% | 61%      | 50%                                     | 65%         | 20% | 88% | 63%                                     | 39%         | 90%         | 65% | 75%                                        | 73%      | 74%         | 31%         | 34%  | 71% | 45%      |  |
| < 70 bpm                                            | 34%                                          | 83%         | 46% | 75% | 68%      | 32%                                       | 91%         | 69% | 68% | 68%      | 14%                                     | 100%        | 100% | 47% | 51%      | 59%                                       | 70%         | 79% | 47% | 62%      | 13%                                     | 87%         | 14% | 85% | 76%                                     | 25%         | 99%         | 93% | 73%                                        | 75%      | 47%         | 60%         | 36%  | 70% | 56%      |  |
| Atrial fibrillation                                 | 8%                                           | 94%         | 37% | 71% | 69%      | 9%                                        | 92%         | 42% | 61% | 60%      | 17%                                     | 89%         | 67%  | 44% | 48%      | 4%                                        | 95%         | 60% | 34% | 35%      | 0%                                      | 96%         | 0%  | 85% | 81%                                     | 16%         | 92%         | 50% | 69%                                        | 67%      | 4%          | 93%         | 22%  | 67% | 64%      |  |
| Systolic blood pressure                             |                                              |             |     |     |          |                                           |             |     |     |          |                                         |             |      |     |          |                                           |             |     |     |          |                                         |             |     |     |                                         |             |             |     |                                            |          |             |             |      |     |          |  |
| < 100 mmHg                                          | 17%                                          | 90%         | 42% | 72% | 68%      | 42%                                       | 66%         | 44% | 64% | 56%      | 42%                                     | 63%         | 60%  | 45% | 51%      | 32%                                       | 79%         | 74% | 38% | 48%      | 25%                                     | 76%         | 15% | 85% | 69%                                     | 45%         | 66%         | 39% | 71%                                        | 59%      | 13%         | 97%         | 67%  | 70% | 69%      |  |
| < 90 mmHg                                           | 2%                                           | 97%         | 24% | 70% | 69%      | 15%                                       | 84%         | 37% | 61% | 57%      | 19%                                     | 93%         | 78%  | 46% | 51%      | 9%                                        | 95%         | 78% | 35% | 38%      | 0%                                      | 87%         | 0%  | 83% | 74%                                     | 12%         | 85%         | 27% | 66%                                        | 61%      | 4%          | 100%        | 100% | 68% | 69%      |  |
| Diastolic blood pressure                            |                                              |             |     |     |          |                                           |             |     |     |          |                                         |             |      |     |          |                                           |             |     |     |          |                                         |             |     |     |                                         |             |             |     |                                            |          |             |             |      |     |          |  |
| < 50 mmHg                                           | 13%                                          | 86%         | 30% | 70% | 65%      | 17%                                       | 76%         | 30% | 59% | 53%      | 8%                                      | 70%         | 27%  | 37% | 35%      | 13%                                       | 91%         | 73% | 35% | 40%      | 13%                                     | 76%         | 8%  | 83% | 67%                                     | 12%         | 85%         | 27% | 66%                                        | 61%      | 9%          | 94%         | 40%  | 68% | 66%      |  |
| < 45 mmHg                                           | 2%                                           | 96%         | 20% | 70% | 68%      | 6%                                        | 90%         | 28% | 60% | 58%      | 3%                                      | 85%         | 20%  | 40% | 38%      | 6%                                        | 95%         | 71% | 35% | 37%      | 0%                                      | 89%         | 0%  | 84% | 76%                                     | 6%          | 90%         | 23% | 66%                                        | 63%      | 2%          | 99%         | 50%  | 68% | 67%      |  |
| Mean arterial pressure                              |                                              |             |     |     |          |                                           |             |     |     |          |                                         |             |      |     |          |                                           |             |     |     |          |                                         |             |     |     |                                         |             |             |     |                                            |          |             |             |      |     |          |  |
| < 70 mmHg                                           | 20%                                          | 84%         | 35% | 71% | 65%      | 43%                                       | 55%         | 38% | 60% | 50%      | 44%                                     | 59%         | 59%  | 44% | 51%      | 30%                                       | 67%         | 64% | 34% | 43%      | 38%                                     | 39%         | 10% | 78% | 39%                                     | 49%         | 56%         | 35% | 69%                                        | 54%      | 9%          | 93%         | 36%  | 68% | 65%      |  |
| < 65 mmHg                                           | 8%                                           | 93%         | 33% | 70% | 68%      | 19%                                       | 78%         | 35% | 60% | 55%      | 14%                                     | 78%         | 45%  | 40% | 41%      | 10%                                       | 86%         | 57% | 33% | 36%      | 38%                                     | 85%         | 30% | 89% | 78%                                     | 22%         | 81%         | 35% | 68%                                        | 62%      | 6%          | 99%         | 75%  | 69% | 69%      |  |
| Cardiac murmurs                                     | 7%                                           | 88%         | 21% | 69% | 64%      | 5%                                        | 91%         | 27% | 60% | 58%      | 3%                                      | 85%         | 20%  | 40% | 38%      | 4%                                        | 98%         | 75% | 35% | 36%      | 13%                                     | 80%         | 10% | 84% | 70%                                     | 4%          | 93%         | 22% | 67%                                        | 64%      | 9%          | 92%         | 33%  | 67% | 65%      |  |
| Crepitations                                        | 17%                                          | 86%         | 33% | 71% | 65%      | 10%                                       | 85%         | 30% | 60% | 56%      | 31%                                     | 63%         | 52%  | 40% | 44%      | 10%                                       | 91%         | 67% | 35% | 38%      | 0%                                      | 89%         | 0%  | 84% | 76%                                     | 12%         | 78%         | 21% | 65%                                        | 56%      | 4%          | 96%         | 33%  | 67% | 66%      |  |
| <b>Organ perfusion</b>                              |                                              |             |     |     |          |                                           |             |     |     |          |                                         |             |      |     |          |                                           |             |     |     |          |                                         |             |     |     |                                         |             |             |     |                                            |          |             |             |      |     |          |  |
| Consciousness                                       |                                              |             |     |     |          |                                           |             |     |     |          |                                         |             |      |     |          |                                           |             |     |     |          |                                         |             |     |     |                                         |             |             |     |                                            |          |             |             |      |     |          |  |
| Voice                                               | 28%                                          | 66%         | 26% | 68% | 55%      | 22%                                       | 77%         | 38% | 61% | 56%      | 19%                                     | 89%         | 70%  | 45% | 49%      | 13%                                       | 74%         | 50% | 31% | 34%      | 13%                                     | 67%         | 6%  | 82% | 59%                                     | 25%         | 75%         | 33% | 68%                                        | 59%      | 60%         | 41%         | 33%  | 68% | 47%      |  |
| Pain                                                | 6%                                           | 95%         | 34% | 70% | 69%      | 3%                                        | 98%         | 50% | 61% | 61%      | 3%                                      | 100%        | 100% | 44% | 44%      | 2%                                        | 98%         | 67% | 34% | 35%      | 0%                                      | 98%         | 0%  | 85% | 83%                                     | 6%          | 97%         | 50% | 68%                                        | 67%      | 13%         | 84%         | 27%  | 66% | 60%      |  |
| Unresponsive                                        | 7%                                           | 93%         | 30% | 70% | 67%      | 7%                                        | 92%         | 38% | 61% | 59%      | 11%                                     | 100%        | 100% | 46% | 49%      | 4%                                        | 84%         | 30% | 31% | 31%      | 0%                                      | 93%         | 0%  | 84% | 80%                                     | 6%          | 93%         | 30% | 67%                                        | 65%      | 15%         | 84%         | 30%  | 67% | 61%      |  |
| Diuresis < 0.5 ml·kg <sup>-1</sup> ·h <sup>-1</sup> |                                              |             |     |     |          |                                           |             |     |     |          |                                         |             |      |     |          |                                           |             |     |     |          |                                         |             |     |     |                                         |             |             |     |                                            |          |             |             |      |     |          |  |
| Over 1 hour                                         | 31%                                          | 71%         | 32% | 71% | 59%      | 49%                                       | 53%         | 40% | 62% | 51%      | 39%                                     | 63%         | 58%  | 44% | 49%      | 40%                                       | 58%         | 65% | 34% | 46%      | 75%                                     | 43%         | 19% | 91% | 48%                                     | 59%         | 50%         | 36% | 71%                                        | 53%      | 32%         | 81%         | 45%  | 71% | 65%      |  |
| Over 6 hours                                        | 39%                                          | 64%         | 31% | 71% | 56%      | 58%                                       | 46%         | 41% | 63% | 51%      | 44%                                     | 59%         | 59%  | 44% | 51%      | 54%                                       | 44%         | 65% | 33% | 50%      | 88%                                     | 48%         | 23% | 96% | 54%                                     | 57%         | 47%         | 34% | 69%                                        | 50%      | 38%         | 66%         | 35%  | 69% | 57%      |  |
| Skin temperature cold*                              |                                              |             |     |     |          |                                           |             |     |     |          |                                         |             |      |     |          |                                           |             |     |     |          |                                         |             |     |     |                                         |             |             |     |                                            |          |             |             |      |     |          |  |
| Delta-T-foot                                        | 58%                                          | 60%         | 38% | 77% | 59%      | 70%                                       | 44%         | 44% | 70% | 54%      | 56%                                     | 52%         | 61%  | 47% | 54%      | 84%                                       | 23%         | 68% | 43% | 63%      | 50%                                     | 70%         | 22% | 89% | 67%                                     | 67%         | 37%         | 34% | 70%                                        | 47%      | 66%         | 59%         | 44%  | 78% | 61%      |  |
| Delta-T-toe                                         | 74%                                          | 47%         | 37% | 81% | 55%      | 84%                                       | 24%         | 41% | 71% | 48%      | 81%                                     | 44%         | 66%  | 63% | 65%      | 91%                                       | 14%         | 67% | 46% | 65%      | 75%                                     | 41%         | 18% | 90% | 46%                                     | 76%         | 26%         | 33% | 69%                                        | 42%      | 77%         | 42%         | 39%  | 78% | 53%      |  |
| Subjectively                                        | 36%                                          | 75%         | 38% | 73% | 63%      | 58%                                       | 60%         | 48% | 69% | 59%      | 47%                                     | 74%         | 71%  | 51% | 59%      | 77%                                       | 40%         | 71% | 47% | 64%      | 38%                                     | 76%         | 21% | 88% | 70%                                     | 43%         | 55%         | 32% | 67%                                        | 51%      | 43%         | 75%         | 45%  | 73% | 65%      |  |
| CRT prolonged**                                     |                                              |             |     |     |          |                                           |             |     |     |          |                                         |             |      |     |          |                                           |             |     |     |          |                                         |             |     |     |                                         |             |             |     |                                            |          |             |             |      |     |          |  |
| Sternum                                             | 17%                                          | 89%         | 40% | 72% | 68%      | 13%                                       | 91%         | 47% | 62% | 61%      | 6%                                      | 93%         | 50%  | 42% | 43%      | 18%                                       | 79%         | 63% | 34% | 39%      | 0%                                      | 93%         | 0%  | 84% | 80%                                     | 18%         | 89%         | 43% | 69%                                        | 65%      | 4%          | 100%        | 100% | 68% | 69%      |  |
| Finger                                              | 17%                                          | 89%         | 40% | 72% | 68%      | 33%                                       | 78%         | 48% | 65% | 60%      | 31%                                     | 96%         | 92%  | 51% | 59%      | 48%                                       | 65%         | 72% | 39% | 54%      | 38%                                     | 89%         | 38% | 89% | 81%                                     | 25%         | 73%         | 32% | 67%                                        | 58%      | 6%          | 93%         | 30%  | 67% | 65%      |  |
| Knee                                                | 22%                                          | 81%         | 33% | 71% | 63%      | 42%                                       | 70%         | 47% | 66% | 59%      | 39%                                     | 78%         | 70%  | 49% | 56%      | 49%                                       | 56%         | 68% | 36% | 51%      | 50%                                     | 83%         | 33% | 90% | 78%                                     | 45%         | 61%         | 36% | 70%                                        | 56%      | 15%         | 88%         | 37%  | 68% | 64%      |  |
| Skin mottling severity***                           |                                              |             |     |     |          |                                           |             |     |     |          |                                         |             |      |     |          |                                           |             |     |     |          |                                         |             |     |     |                                         |             |             |     |                                            |          |             |             |      |     |          |  |
| >3 (knee)                                           | 12%                                          | 90%         | 34% | 71% | 67%      | 20%                                       | 88%         | 52% | 64% | 62%      | 14%                                     | 78%         | 45%  | 40% | 41%      | 22%                                       | 79%         | 67% | 35% | 42%      | 25%                                     | 91%         | 33% | 88% | 81%                                     | 24%         | 85%         | 43% | 70%                                        | 65%      | 13%         | 96%         | 60%  | 69% | 69%      |  |
| >4 (severe)                                         | 2%                                           | 98%         | 33% | 70% | 69%      | 4%                                        | 96%         | 43% | 61% | 61%      | 6%                                      | 100%        | 100% | 44% | 46%      | 2%                                        | 98%         | 67% | 34% | 35%      | 0%                                      | 93%         | 0%  | 84% | 80%                                     | 10%         | 94%         | 45% | 68%                                        | 67%      | 0%          | 100%        |      | 67% | 67%      |  |

\*ΔTc-p was considered cold if >7 °C. \*\*CRT was considered prolonged if >4.5 seconds. \*\*\*Mottling was scored according to Ait-Oufella et al. Abbreviations: PPV, positive predictive value; NPV, negative predictive value; CRT, capillary refill time.

## Sensitivity analysis I: primary analysis with imputed cardiac index measurements

## Univariable (unadjusted) analyses

e-Table 9. Univariable associations of clinical examination with cardiac index as a continuous variable

| Variable                                                      | Coefficient | SE   | 95% CI         | R <sup>2</sup> | P-Value |
|---------------------------------------------------------------|-------------|------|----------------|----------------|---------|
| <b>Covariates</b>                                             |             |      |                |                |         |
| Age, years                                                    | -0.01       | 0.00 | -0.01 to 0.00  | 0.008          | 0.008   |
| Male gender                                                   | -0.26       | 0.06 | -0.38 to -0.13 | 0.019          | <0.001  |
| Mechanical ventilation                                        | -0.32       | 0.06 | -0.44 to -0.19 | 0.031          | <0.001  |
| PEEP, cm H <sub>2</sub> O                                     | -0.03       | 0.01 | -0.05 to -0.02 | 0.024          | <0.001  |
| Noradrenaline dose, µg·kg <sup>-1</sup> ·min <sup>-1</sup>    | 0.29        | 0.16 | -0.03 to 0.62  | 0.004          | 0.077   |
| <b>Central circulation</b>                                    |             |      |                |                |         |
| Respiratory rate, per minute                                  | 0.01        | 0.01 | 0.00 to 0.02   | 0.007          | 0.014   |
| Heart rate, beats per minute                                  | 0.02        | 0.00 | 0.01 to 0.02   | 0.151          | <0.001  |
| Atrial fibrillation                                           | -0.15       | 0.12 | -0.39 to 0.08  | 0.002          | 0.195   |
| Systolic blood pressure, mmHg                                 | 0.00        | 0.00 | 0.00 to 0.01   | 0.018          | <0.001  |
| Diastolic blood pressure, mmHg                                | 0.00        | 0.00 | -0.01 to 0.00  | 0.002          | 0.155   |
| Mean arterial pressure, mmHg                                  | 0.00        | 0.00 | 0.00 to 0.01   | 0.003          | 0.136   |
| Central venous pressure, mmHg                                 | -0.01       | 0.01 | -0.04 to 0.01  | 0.008          | 0.241   |
| Cardiac murmurs                                               | 0.36        | 0.11 | 0.15 to 0.57   | 0.002          | <0.001  |
| Crepitations                                                  | 0.10        | 0.09 | -0.08 to 0.27  | 0.002          | 0.280   |
| <b>Organ perfusion</b>                                        |             |      |                |                |         |
| Consciousness, n (%)                                          |             |      |                |                |         |
| alert                                                         |             |      | Reference      | 0.030          |         |
| reacting to voice                                             | -0.10       | 0.09 | -0.27 to 0.06  |                | 0.223   |
| reacting to pain                                              | -0.37       | 0.12 | -0.60 to -0.15 |                | 0.001   |
| unresponsive                                                  | -0.35       | 0.07 | -0.49 to -0.20 |                | <0.001  |
| Urine output last hour, ml·kg <sup>-1</sup> ·h <sup>-1</sup>  | 0.06        | 0.03 | 0.00 to 0.12   | 0.004          | 0.061   |
| Urine output in 6 hours, ml·kg <sup>-1</sup> ·h <sup>-1</sup> | 0.07        | 0.04 | 0.00 to 0.15   | 0.005          | 0.044   |
| Central temperature, °C                                       | 0.22        | 0.03 | 0.15 to 0.28   | 0.050          | <0.001  |
| ΔTc-p, central to dorsum foot, °C                             | -0.06       | 0.01 | -0.07 to -0.03 | 0.048          | <0.001  |
| ΔTc-p, central to big toe, °C                                 | -0.05       | 0.01 | -0.08 to -0.04 | 0.044          | <0.001  |
| Cold extremities, subjective                                  | 0.34        | 0.06 | 0.22 to 0.46   | 0.033          | <0.001  |
| Capillary refill time sternum, s                              | -0.12       | 0.03 | -0.18 to -0.06 | 0.025          | <0.001  |
| Capillary refill time finger, s                               | -0.05       | 0.01 | -0.08 to -0.03 | 0.017          | <0.001  |
| Capillary refill time knee, s                                 | -0.05       | 0.01 | -0.08 to -0.03 | 0.022          | <0.001  |
| Skin mottling severity, n (%)                                 |             |      |                |                |         |
| Mild (0-1)                                                    |             |      | Reference      | 0.001          |         |
| Moderate (2-3)                                                | -0.03       | 0.07 | -0.17 to 0.11  |                | 0.644   |
| Severe (4-5)                                                  | -0.10       | 0.17 | -0.44 to 0.24  |                | 0.563   |

Abbreviations: SE, standard error; PEEP, positive end expiratory pressure; ΔTc-p, central-to-peripheral temperature difference.



## Multivariable linear regression, internal validation and diagnostics

e-Table 10. Multivariable linear regression, predictors for cardiac index as a continuous variable

| Variable                                                                        | B                                | SE          | 95% CI              | P value | $\beta$ | Significant # out of 100 |
|---------------------------------------------------------------------------------|----------------------------------|-------------|---------------------|---------|---------|--------------------------|
| <b><i>Covariates</i></b>                                                        |                                  |             |                     |         |         |                          |
| Male gender                                                                     | -0.20                            | 0.06        | -0.31 to -0.09      | <0.001  | -0.10   | 98                       |
| Mechanical ventilation                                                          | -0.19                            | 0.06        | -0.30 to -0.07      | 0.001   | -0.10   | 93                       |
| Noradrenaline per $\mu\text{g}\cdot\text{kg}^{-1}\cdot\text{min}^{-1}$ increase | 0.32                             | 0.16        | 0.01 to 0.63        | 0.046   | 0.06    | 53                       |
| <b><i>Clinical signs reflecting the central circulation</i></b>                 |                                  |             |                     |         |         |                          |
| Respiratory rate per minute increase                                            | -0.01                            | 0.00        | -0.02 to 0.00       | 0.004   | -0.09   | 81                       |
| Heart rate in beats per minute                                                  | 0.02                             | 0.00        | 0.02 to 0.02        | <0.001  | 0.43    | 100                      |
| Atrial fibrillation                                                             | -0.32                            | 0.11        | -0.52 to -0.11      | 0.003   | -0.09   | 89                       |
| Systolic blood pressure per mmHg increase                                       | 0.01                             | 0.00        | 0.01 to 0.01        | <0.001  | 0.24    | 100                      |
| Diastolic blood pressure per mmHg increase                                      | -0.01                            | 0.00        | -0.02 to -0.01      | <0.001  | -0.17   | 100                      |
| Cardiac murmurs                                                                 | 0.24                             | 0.09        | 0.07 to 0.42        | 0.007   | 0.08    | 70                       |
| Central temperature per $^{\circ}\text{C}$ increase                             | 0.09                             | 0.03        | 0.03 to 0.15        | 0.002   | 0.09    | 87                       |
| <b><i>Clinical signs reflecting organ perfusion</i></b>                         |                                  |             |                     |         |         |                          |
| CRT on the sternum per sec increase                                             | -0.08                            | 0.03        | -0.13 to -0.02      | 0.005   | -0.09   | 91                       |
| $\Delta\text{Tc-p}$ , central to big toe per $^{\circ}\text{C}$ increase        | -0.05                            | 0.01        | -0.06 to -0.03      | <0.001  | -0.18   | 100                      |
|                                                                                 | <b><math>R^2</math></b>          | <b>0.30</b> | <b>0.26 to 0.37</b> |         |         |                          |
|                                                                                 | <b>Adjusted <math>R^2</math></b> | <b>0.29</b> | <b>0.25 to 0.36</b> |         |         |                          |

Abbreviations:  $R^2$ , R squared; B, coefficient in the linear regression model; SE, standard error; CI, confidence interval;  $\beta$ , standardized  $\beta$ -coefficient in the linear regression model; CRT, capillary refill time;  $\Delta\text{Tc-p}$ , central-to-peripheral temperature difference.

## Sensitivity analysis II: diagnostic performance with imputed cardiac index measurements

e-Table 11a. Diagnosing a low cardiac index: tabular display derived from the 2x2 matrix for each clinical sign

| Results for each clinical sign                         | N    | Cardiac index < 2.2 L·min <sup>-1</sup> ·m <sup>-2</sup> |                       |                       |                      | Cardiac index < 2.5 L·min <sup>-1</sup> ·m <sup>-2</sup> |                       |                       |                      |
|--------------------------------------------------------|------|----------------------------------------------------------|-----------------------|-----------------------|----------------------|----------------------------------------------------------|-----------------------|-----------------------|----------------------|
|                                                        |      | A = True<br>positive                                     | B = False<br>positive | C = False<br>negative | D = True<br>negative | A = True<br>positive                                     | B = False<br>positive | C = False<br>negative | D = True<br>negative |
| <i>Central circulation</i>                             |      |                                                          |                       |                       |                      |                                                          |                       |                       |                      |
| Respiratory rate > 22 pm                               | 1075 | 292                                                      | 481                   | 76                    | 226                  | 405                                                      | 368                   | 121                   | 181                  |
| Heart rate < 100 bpm                                   | 1075 | 304                                                      | 462                   | 64                    | 245                  | 429                                                      | 337                   | 97                    | 212                  |
| Atrial fibrillation                                    | 1075 | 31                                                       | 47                    | 337                   | 660                  | 43                                                       | 35                    | 483                   | 514                  |
| SBP < 90 mmHg                                          | 1075 | 34                                                       | 65                    | 334                   | 642                  | 50                                                       | 49                    | 476                   | 500                  |
| DBP < 45 mmHg                                          | 1075 | 16                                                       | 47                    | 352                   | 660                  | 29                                                       | 34                    | 497                   | 515                  |
| MAP < 65 mmHg                                          | 1075 | 52                                                       | 98                    | 316                   | 609                  | 76                                                       | 74                    | 450                   | 475                  |
| Cardiac murmurs                                        | 1075 | 23                                                       | 75                    | 345                   | 632                  | 37                                                       | 61                    | 489                   | 488                  |
| Crepitations                                           | 1075 | 47                                                       | 102                   | 321                   | 605                  | 66                                                       | 83                    | 460                   | 466                  |
| <i>Organ perfusion</i>                                 |      |                                                          |                       |                       |                      |                                                          |                       |                       |                      |
| Consciousness                                          |      |                                                          |                       |                       |                      |                                                          |                       |                       |                      |
| reacting to voice                                      | 1075 | 91                                                       | 204                   | 277                   | 503                  | 136                                                      | 159                   | 390                   | 390                  |
| reacting to pain                                       | 1075 | 17                                                       | 26                    | 351                   | 681                  | 22                                                       | 21                    | 504                   | 528                  |
| unresponsive                                           | 1075 | 26                                                       | 51                    | 342                   | 656                  | 38                                                       | 39                    | 488                   | 510                  |
| Urine output <0.5 ml·kg <sup>-1</sup> ·h <sup>-1</sup> |      |                                                          |                       |                       |                      |                                                          |                       |                       |                      |
| Over 1 hour                                            | 1075 | 182                                                      | 313                   | 186                   | 394                  | 261                                                      | 234                   | 265                   | 315                  |
| Over 6 hours                                           | 1075 | 152                                                      | 263                   | 216                   | 444                  | 212                                                      | 203                   | 314                   | 346                  |
| Skin temperature cold*                                 |      |                                                          |                       |                       |                      |                                                          |                       |                       |                      |
| ΔTc-p, dorsum foot                                     | 1075 | 74                                                       | 260                   | 294                   | 446                  | 118                                                      | 216                   | 408                   | 332                  |
| ΔTc-p, big toe                                         | 1075 | 130                                                      | 373                   | 238                   | 333                  | 200                                                      | 303                   | 326                   | 245                  |
| Cold subjective                                        | 1075 | 177                                                      | 225                   | 191                   | 482                  | 239                                                      | 163                   | 287                   | 386                  |
| CRT prolonged**                                        |      |                                                          |                       |                       |                      |                                                          |                       |                       |                      |
| Sternum                                                | 1075 | 38                                                       | 41                    | 330                   | 666                  | 47                                                       | 32                    | 479                   | 517                  |
| Finger                                                 | 1075 | 94                                                       | 113                   | 274                   | 594                  | 162                                                      | 130                   | 364                   | 419                  |
| Knee                                                   | 1075 | 122                                                      | 170                   | 246                   | 537                  | 74                                                       | 63                    | 452                   | 486                  |
| Skin mottling severity***                              |      |                                                          |                       |                       |                      |                                                          |                       |                       |                      |
| Over the knee (≥3)                                     | 1075 | 61                                                       | 76                    | 307                   | 631                  | 74                                                       | 63                    | 452                   | 486                  |
| Severe (≥4)                                            | 1075 | 13                                                       | 20                    | 355                   | 687                  | 17                                                       | 16                    | 509                   | 533                  |

\*ΔTc-p was considered cold if >7 °C. \*\*CRT was considered prolonged if >4.5 seconds. \*\*\*Mottling was scored according to Ait-Oufella et al. Abbreviations: SBP, systolic blood pressure; DBP, diastolic blood pressure; MAP, mean arterial pressure; ΔTc-p, central-to-peripheral temperature difference; CRT, capillary refill time.

e-Table 11b. Diagnosing a low cardiac index: Outcome measures for each clinical sign

| Performance of each clinical sign                             | Cardiac index < 2.2 L·min <sup>-1</sup> ·m <sup>-2</sup> |       |      |      |          |      |      | Cardiac index < 2.5 L·min <sup>-1</sup> ·m <sup>-2</sup> |       |      |      |          |      |      |
|---------------------------------------------------------------|----------------------------------------------------------|-------|------|------|----------|------|------|----------------------------------------------------------|-------|------|------|----------|------|------|
|                                                               | Sens.                                                    | Spec. | PPV  | NPV  | Accuracy | LR + | LR - | Sens.                                                    | Spec. | PPV  | NPV  | Accuracy | LR + | LR - |
| <i>Central circulation</i>                                    |                                                          |       |      |      |          |      |      |                                                          |       |      |      |          |      |      |
| Respiratory rate > 22 pm                                      | 0.79                                                     | 0.32  | 0.38 | 0.75 | 0.54     | 1.17 | 0.65 | 0.77                                                     | 0.33  | 0.52 | 0.60 | 0.57     | 1.15 | 0.70 |
| Heart rate < 100 bpm                                          | 0.83                                                     | 0.35  | 0.40 | 0.79 | 0.59     | 1.26 | 0.50 | 0.82                                                     | 0.39  | 0.56 | 0.69 | 0.64     | 1.33 | 0.48 |
| Atrial fibrillation                                           | 0.08                                                     | 0.93  | 0.40 | 0.66 | 0.63     | 1.27 | 0.98 | 0.08                                                     | 0.94  | 0.55 | 0.52 | 0.55     | 1.28 | 0.98 |
| SBP < 90 mmHg                                                 | 0.09                                                     | 0.91  | 0.34 | 0.66 | 0.59     | 1.00 | 1.00 | 0.10                                                     | 0.91  | 0.51 | 0.52 | 0.49     | 1.07 | 0.99 |
| DBP < 45 mmHg                                                 | 0.04                                                     | 0.93  | 0.25 | 0.65 | 0.58     | 0.65 | 1.02 | 0.06                                                     | 0.94  | 0.46 | 0.51 | 0.53     | 0.89 | 1.01 |
| MAP < 65 mmHg                                                 | 0.14                                                     | 0.86  | 0.35 | 0.66 | 0.55     | 1.02 | 1.00 | 0.14                                                     | 0.87  | 0.51 | 0.51 | 0.49     | 1.07 | 0.99 |
| Cardiac murmurs                                               | 0.06                                                     | 0.89  | 0.23 | 0.65 | 0.61     | 0.59 | 1.05 | 0.07                                                     | 0.89  | 0.38 | 0.50 | 0.49     | 0.63 | 1.05 |
| Crepitations                                                  | 0.13                                                     | 0.86  | 0.32 | 0.65 | 0.61     | 0.89 | 1.02 | 0.13                                                     | 0.85  | 0.44 | 0.50 | 0.49     | 0.83 | 1.03 |
| <i>Organ perfusion</i>                                        |                                                          |       |      |      |          |      |      |                                                          |       |      |      |          |      |      |
| <i>Consciousness</i>                                          |                                                          |       |      |      |          |      |      |                                                          |       |      |      |          |      |      |
| reacting to voice                                             | 0.25                                                     | 0.71  | 0.31 | 0.64 | 0.65     | 0.86 | 1.06 | 0.26                                                     | 0.71  | 0.46 | 0.50 | 0.51     | 0.89 | 1.04 |
| reacting to pain                                              | 0.05                                                     | 0.96  | 0.40 | 0.66 | 0.63     | 1.26 | 0.99 | 0.04                                                     | 0.96  | 0.51 | 0.51 | 0.51     | 1.09 | 1.00 |
| unresponsive                                                  | 0.07                                                     | 0.93  | 0.34 | 0.66 | 0.54     | 0.98 | 1.00 | 0.07                                                     | 0.93  | 0.49 | 0.51 | 0.54     | 1.02 | 1.00 |
| <i>Urine output &lt;0.5 ml·kg<sup>-1</sup>·h<sup>-1</sup></i> |                                                          |       |      |      |          |      |      |                                                          |       |      |      |          |      |      |
| Over 1 hour                                                   | 0.49                                                     | 0.56  | 0.37 | 0.68 | 0.55     | 1.12 | 0.91 | 0.50                                                     | 0.57  | 0.53 | 0.54 | 0.52     | 1.16 | 0.88 |
| Over 6 hours                                                  | 0.41                                                     | 0.63  | 0.37 | 0.67 | 0.48     | 1.11 | 0.93 | 0.40                                                     | 0.63  | 0.51 | 0.52 | 0.42     | 1.09 | 0.95 |
| <i>Skin temperature cold*</i>                                 |                                                          |       |      |      |          |      |      |                                                          |       |      |      |          |      |      |
| Δ-T, dorsum foot                                              | 0.20                                                     | 0.63  | 0.22 | 0.60 | 0.43     | 0.55 | 1.26 | 0.22                                                     | 0.61  | 0.35 | 0.45 | 0.41     | 0.57 | 1.28 |
| Δ-T, big toe                                                  | 0.35                                                     | 0.47  | 0.26 | 0.58 | 0.61     | 0.67 | 1.37 | 0.38                                                     | 0.45  | 0.40 | 0.43 | 0.58     | 0.69 | 1.39 |
| Cold subjective                                               | 0.48                                                     | 0.68  | 0.44 | 0.72 | 0.65     | 1.51 | 0.76 | 0.45                                                     | 0.70  | 0.59 | 0.57 | 0.52     | 1.53 | 0.78 |
| <i>CRT prolonged**</i>                                        |                                                          |       |      |      |          |      |      |                                                          |       |      |      |          |      |      |
| Sternum                                                       | 0.10                                                     | 0.94  | 0.48 | 0.67 | 0.64     | 1.78 | 0.95 | 0.09                                                     | 0.94  | 0.59 | 0.52 | 0.54     | 1.53 | 0.97 |
| Finger                                                        | 0.26                                                     | 0.84  | 0.45 | 0.68 | 0.61     | 1.60 | 0.89 | 0.31                                                     | 0.76  | 0.55 | 0.54 | 0.52     | 1.30 | 0.91 |
| Knee                                                          | 0.33                                                     | 0.76  | 0.42 | 0.69 | 0.64     | 1.38 | 0.88 | 0.14                                                     | 0.89  | 0.54 | 0.52 | 0.52     | 1.23 | 0.97 |
| <i>Skin mottling severity***</i>                              |                                                          |       |      |      |          |      |      |                                                          |       |      |      |          |      |      |
| Over the knee (≥3)                                            | 0.17                                                     | 0.89  | 0.45 | 0.67 | 0.65     | 1.54 | 0.93 | 0.14                                                     | 0.89  | 0.54 | 0.52 | 0.51     | 1.23 | 0.97 |
| Severe (≥4)                                                   | 0.04                                                     | 0.97  | 0.39 | 0.66 | 0.61     | 1.25 | 0.99 | 0.03                                                     | 0.97  | 0.52 | 0.51 | 0.49     | 1.11 | 1.00 |

\*ΔTc-p was considered cold if >7 °C. \*\*CRT was considered prolonged if >4.5 seconds. \*\*\*Mottling was scored according to Ait-Oufella et al. Abbreviations: Sens, sensitivity; Spec, specificity PPV, positive predictive value; NPV, negative predictive value; LR, likelihood ratio; SBP, systolic blood pressure; DBP, diastolic blood pressure; MAP, mean arterial pressure; ΔTc-p, central-to-peripheral temperature difference; CRT, capillary refill time.

e-Table 12a. Diagnosing a high cardiac index: tabular display derived from the 2x2 matrix for each clinical sign

| Results for each clinical sign                         | Cardiac index > 4.0 L·min <sup>-1</sup> ·m <sup>-2</sup> |                      |                       |                       | Cardiac index > 4.5 L·min <sup>-1</sup> ·m <sup>-2</sup> |                      |                       |                       |                      |
|--------------------------------------------------------|----------------------------------------------------------|----------------------|-----------------------|-----------------------|----------------------------------------------------------|----------------------|-----------------------|-----------------------|----------------------|
|                                                        | N                                                        | A = True<br>positive | B = False<br>positive | C = False<br>negative | D = True<br>negative                                     | A = True<br>positive | B = False<br>positive | C = False<br>negative | D = True<br>negative |
| <b>Central circulation</b>                             |                                                          |                      |                       |                       |                                                          |                      |                       |                       |                      |
| Respiratory rate > 22 pm                               | 1075                                                     | 52                   | 721                   | 29                    | 273                                                      | 23                   | 750                   | 15                    | 287                  |
| Heart rate < 100 bpm                                   | 1075                                                     | 37                   | 729                   | 44                    | 265                                                      | 11                   | 755                   | 27                    | 282                  |
| Atrial fibrillation                                    | 1075                                                     | 6                    | 72                    | 75                    | 922                                                      | 0                    | 78                    | 38                    | 959                  |
| SBP < 90 mmHg                                          | 1075                                                     | 10                   | 89                    | 71                    | 905                                                      | 5                    | 94                    | 33                    | 943                  |
| DBP < 45 mmHg                                          | 1075                                                     | 7                    | 56                    | 74                    | 938                                                      | 4                    | 59                    | 34                    | 978                  |
| MAP < 65 mmHg                                          | 1075                                                     | 13                   | 137                   | 68                    | 857                                                      | 7                    | 143                   | 31                    | 894                  |
| Cardiac murmurs                                        | 1075                                                     | 16                   | 82                    | 65                    | 912                                                      | 8                    | 90                    | 30                    | 947                  |
| Crepitations                                           | 1075                                                     | 18                   | 131                   | 63                    | 863                                                      | 7                    | 142                   | 31                    | 895                  |
| <b>Organ perfusion</b>                                 |                                                          |                      |                       |                       |                                                          |                      |                       |                       |                      |
| Consciousness                                          |                                                          |                      |                       |                       |                                                          |                      |                       |                       |                      |
| reacting to voice                                      | 1075                                                     | 32                   | 263                   | 49                    | 731                                                      | 15                   | 280                   | 23                    | 757                  |
| reacting to pain                                       | 1075                                                     | 4                    | 39                    | 77                    | 955                                                      | 2                    | 41                    | 36                    | 996                  |
| unresponsive                                           | 1075                                                     | 9                    | 68                    | 72                    | 926                                                      | 4                    | 73                    | 34                    | 964                  |
| Urine output <0.5 ml·kg <sup>-1</sup> ·h <sup>-1</sup> |                                                          |                      |                       |                       |                                                          |                      |                       |                       |                      |
| Over 1 hour                                            | 1075                                                     | 35                   | 460                   | 46                    | 534                                                      | 15                   | 480                   | 23                    | 557                  |
| Over 6 hours                                           | 1075                                                     | 29                   | 385                   | 52                    | 609                                                      | 15                   | 399                   | 23                    | 638                  |
| Skin temperature cold*                                 |                                                          |                      |                       |                       |                                                          |                      |                       |                       |                      |
| ΔTc-p, dorsum foot                                     | 1075                                                     | 27                   | 544                   | 54                    | 450                                                      | 11                   | 560                   | 27                    | 477                  |
| ΔTc-p, big toe                                         | 1075                                                     | 39                   | 701                   | 42                    | 293                                                      | 18                   | 722                   | 20                    | 315                  |
| Cold subjective                                        | 1075                                                     | 21                   | 381                   | 60                    | 613                                                      | 7                    | 395                   | 31                    | 642                  |
| CRT prolonged***                                       |                                                          |                      |                       |                       |                                                          |                      |                       |                       |                      |
| Sternum                                                | 1075                                                     | 3                    | 76                    | 78                    | 918                                                      | 1                    | 78                    | 37                    | 959                  |
| Finger                                                 | 1075                                                     | 13                   | 194                   | 68                    | 800                                                      | 7                    | 200                   | 31                    | 837                  |
| Knee                                                   | 1075                                                     | 18                   | 274                   | 63                    | 720                                                      | 8                    | 284                   | 30                    | 753                  |
| Skin mottling severity***                              |                                                          |                      |                       |                       |                                                          |                      |                       |                       |                      |
| Over the knee (≥3)                                     | 1075                                                     | 12                   | 125                   | 69                    | 869                                                      | 4                    | 133                   | 34                    | 904                  |
| Severe (≥4)                                            | 1075                                                     | 1                    | 32                    | 80                    | 962                                                      | 0                    | 33                    | 38                    | 1004                 |

\*ΔTc-p was considered cold if >7 °C. \*\*CRT was considered prolonged if >4.5 seconds. \*\*\*Mottling was scored according to Ait-Oufella et al. Abbreviations: SBP, systolic blood pressure; DBP, diastolic blood pressure; MAP, mean arterial pressure; ΔTc-p, central-to-peripheral temperature difference; CRT, capillary refill time.

e-Table 12b. Diagnosing a high cardiac index: Outcome measures for each clinical sign

| Performance of each clinical sign                      | Cardiac index > 4.0 L·min <sup>-1</sup> ·m <sup>-2</sup> |       |      |      |          |      |      | Cardiac index > 4.5 L·min <sup>-1</sup> ·m <sup>-2</sup> |       |      |      |          |      |      |
|--------------------------------------------------------|----------------------------------------------------------|-------|------|------|----------|------|------|----------------------------------------------------------|-------|------|------|----------|------|------|
|                                                        | Sens.                                                    | Spec. | PPV  | NPV  | Accuracy | LR + | LR - | Sens.                                                    | Spec. | PPV  | NPV  | Accuracy | LR + | LR - |
| <b>Central circulation</b>                             |                                                          |       |      |      |          |      |      |                                                          |       |      |      |          |      |      |
| Respiratory rate > 22 pm                               | 0.64                                                     | 0.27  | 0.07 | 0.90 | 0.30     | 0.89 | 1.30 | 0.61                                                     | 0.28  | 0.03 | 0.95 | 0.29     | 0.84 | 1.43 |
| Heart rate < 100 bpm                                   | 0.46                                                     | 0.27  | 0.05 | 0.86 | 0.28     | 0.62 | 2.04 | 0.29                                                     | 0.27  | 0.01 | 0.93 | 0.27     | 0.40 | 2.61 |
| Atrial fibrillation                                    | 0.07                                                     | 0.93  | 0.08 | 0.92 | 0.86     | 1.02 | 1.00 | 0.00                                                     | 0.92  | 0.00 | 0.96 | 0.89     | 0.00 | 1.08 |
| SBP < 90 mmHg                                          | 0.12                                                     | 0.91  | 0.10 | 0.93 | 0.85     | 1.38 | 0.96 | 0.13                                                     | 0.91  | 0.05 | 0.97 | 0.88     | 1.45 | 0.95 |
| DBP < 45 mmHg                                          | 0.09                                                     | 0.94  | 0.11 | 0.93 | 0.88     | 1.53 | 0.97 | 0.11                                                     | 0.94  | 0.06 | 0.96 | 0.91     | 1.85 | 0.95 |
| MAP < 65 mmHg                                          | 0.16                                                     | 0.86  | 0.09 | 0.93 | 0.81     | 1.16 | 0.97 | 0.18                                                     | 0.86  | 0.05 | 0.97 | 0.84     | 1.34 | 0.95 |
| Cardiac murmurs                                        | 0.20                                                     | 0.92  | 0.16 | 0.93 | 0.86     | 2.39 | 0.87 | 0.21                                                     | 0.91  | 0.08 | 0.97 | 0.89     | 2.43 | 0.86 |
| Crepitations                                           | 0.22                                                     | 0.87  | 0.12 | 0.93 | 0.82     | 1.69 | 0.90 | 0.18                                                     | 0.86  | 0.05 | 0.97 | 0.84     | 1.35 | 0.95 |
| <b>Organ perfusion</b>                                 |                                                          |       |      |      |          |      |      |                                                          |       |      |      |          |      |      |
| Consciousness                                          |                                                          |       |      |      |          |      |      |                                                          |       |      |      |          |      |      |
| reacting to voice                                      | 0.40                                                     | 0.74  | 0.11 | 0.94 | 0.71     | 1.49 | 0.82 | 0.39                                                     | 0.73  | 0.05 | 0.97 | 0.72     | 1.46 | 0.83 |
| reacting to pain                                       | 0.05                                                     | 0.96  | 0.09 | 0.93 | 0.89     | 1.26 | 0.99 | 0.05                                                     | 0.96  | 0.05 | 0.97 | 0.93     | 1.33 | 0.99 |
| unresponsive                                           | 0.11                                                     | 0.93  | 0.12 | 0.93 | 0.87     | 1.62 | 0.95 | 0.11                                                     | 0.93  | 0.05 | 0.96 | 0.90     | 1.50 | 0.96 |
| Urine output <0.5 ml·kg <sup>-1</sup> ·h <sup>-1</sup> |                                                          |       |      |      |          |      |      |                                                          |       |      |      |          |      |      |
| Over 1 hour                                            | 0.43                                                     | 0.54  | 0.07 | 0.92 | 0.53     | 0.93 | 1.06 | 0.39                                                     | 0.54  | 0.03 | 0.97 | 0.53     | 0.85 | 1.13 |
| Over 6 hours                                           | 0.36                                                     | 0.61  | 0.07 | 0.92 | 0.59     | 0.92 | 1.05 | 0.39                                                     | 0.62  | 0.04 | 0.95 | 0.61     | 1.03 | 0.98 |
| Skin temperature cold*                                 |                                                          |       |      |      |          |      |      |                                                          |       |      |      |          |      |      |
| Δ-T, dorsum foot                                       | 0.48                                                     | 0.29  | 0.05 | 0.87 | 0.31     | 0.68 | 1.76 | 0.29                                                     | 0.46  | 0.02 | 0.94 | 0.45     | 0.54 | 1.54 |
| Δ-T, big toe                                           | 0.33                                                     | 0.45  | 0.05 | 0.89 | 0.44     | 0.61 | 1.47 | 0.47                                                     | 0.30  | 0.02 | 0.95 | 0.31     | 0.68 | 1.73 |
| Cold subjective                                        | 0.26                                                     | 0.62  | 0.05 | 0.91 | 0.59     | 0.68 | 1.20 | 0.18                                                     | 0.62  | 0.02 | 0.96 | 0.60     | 0.48 | 1.32 |
| CRT prolonged**                                        |                                                          |       |      |      |          |      |      |                                                          |       |      |      |          |      |      |
| Sternum                                                | 0.04                                                     | 0.92  | 0.04 | 0.92 | 0.86     | 0.48 | 1.04 | 0.03                                                     | 0.92  | 0.01 | 0.96 | 0.89     | 0.35 | 1.05 |
| Finger                                                 | 0.16                                                     | 0.80  | 0.06 | 0.92 | 0.76     | 0.82 | 1.04 | 0.18                                                     | 0.81  | 0.03 | 0.96 | 0.79     | 0.96 | 1.01 |
| Knee                                                   | 0.22                                                     | 0.72  | 0.06 | 0.92 | 0.69     | 0.81 | 1.07 | 0.21                                                     | 0.73  | 0.03 | 0.96 | 0.71     | 0.77 | 1.09 |
| Skin mottling severity***                              |                                                          |       |      |      |          |      |      |                                                          |       |      |      |          |      |      |
| Over the knee (≥3)                                     | 0.15                                                     | 0.87  | 0.09 | 0.93 | 0.82     | 1.18 | 0.97 | 0.11                                                     | 0.87  | 0.03 | 0.96 | 0.84     | 0.82 | 1.03 |
| Severe (≥4)                                            | 0.01                                                     | 0.97  | 0.03 | 0.92 | 0.90     | 0.38 | 1.02 | 0.00                                                     | 0.97  | 0.00 | 0.97 | 0.93     | 0.00 | 1.03 |

\*ΔTc-p was considered cold if >7 °C. \*\*CRT was considered prolonged if >4.5 seconds. \*\*\*Mottling was scored according to Ait-Oufella et al. Abbreviations: Sens, sensitivity; Spec, specificity PPV, positive predictive value; NPV, negative predictive value; LR, likelihood ratio; SBP, systolic blood pressure; DBP, diastolic blood pressure; MAP, mean arterial pressure; ΔTc-p, central-to-peripheral temperature difference.
